# Supplementary material
Source: publisher figshare collection journal article supplement (https://acs.figshare.com/ndownloader/files/10290879)
Supplement: Supplementary file 1 [file 10290879]

## Supporting information

# Chimeric Streptavidins as Host Proteins for Artificial Metalloenzymes

*Michela M. Pellizzoni,<sup>1†</sup> Fabian Schwizer,<sup>1</sup> Christopher W. Wood,<sup>2</sup> Valerio Sabatino,<sup>1</sup> Yoann Cotelte,<sup>3‡</sup> Stefan Matile,<sup>3</sup> Derek N. Woolfson,<sup>2,4,5\*</sup> Thomas R. Ward<sup>1,\*</sup>*

<sup>1</sup>University of Basel, Department of Chemistry, Mattenstrasse 24a, BPR 1096, CH 4002 Basel, Switzerland.

<sup>2</sup>School of Chemistry, University of Bristol, Bristol, BS8 1TS, United Kingdom.

<sup>3</sup>School of Chemistry and Biochemistry, University of Geneva, Quai Ernest Ansermet 30, CH-1211 Geneva, Switzerland.

<sup>4</sup>School of Biochemistry, University of Bristol, Biomedical Sciences Building, University Walk, Bristol, BS8 1TD, UK

<sup>5</sup>BrisSynBio, University of Bristol, Life Sciences Building, Tyndall Avenue, Bristol, BS8 1TQ, UK

**Corresponding Author**

\*E-mail: [thomas.ward@unibas.ch](mailto:thomas.ward@unibas.ch)

[D.N.Woolfson@bristol.ac.uk](mailto:D.N.Woolfson@bristol.ac.uk)

## **Table of contents**

|                                                                        |            |
|------------------------------------------------------------------------|------------|
| <b>S1. Supplementary natural loop design .....</b>                     | <b>S3</b>  |
| <b>S2. Cloning procedure, Protein expression and purification.....</b> | <b>S4</b>  |
| <b>S3. General procedures and analytical methods.....</b>              | <b>S11</b> |
| <b>S4. Annexes .....</b>                                               | <b>S19</b> |
| <b>S5. References.....</b>                                             | <b>S29</b> |

## S1. Supplementary natural loop design

Loops were extracted from the PDB (downloaded May 2016). Each structure was loaded into ISAMBARD<sup>1</sup> as an AMPAL object and secondary structure was assigned using the "tag\_secondary\_structure" method, which annotates the secondary structure of each residue using DSSP.<sup>2-3</sup> Loop regions were defined as any continuous region of backbone structure assigned 'B', 'T', 'S' or unlabelled, which correspond to isolated  $\beta$ -bridge, hydrogen-bonded turn, bend or random coil respectively. Data on each loop was stored in a SQLite database, including:

1. PDB code
2. Residue and chain identifiers for the entering residue (immediately before the loop) and the exiting residue (immediately after the loop)
3. Secondary structure assignments for the entering and exiting residues
4. Crossing angle of the exiting and entering regions of secondary structure
5. The resolution of the structure
6. C $\alpha$ -C $\alpha$  distance of the entering and exiting residue
7. Backbone coordinates for the loop region and the entering/exiting residues
8. Amino-acid sequence of the loop

The region between residues A46 and A50 of Sav were targeted to be replaced with a novel loop region. The C $\alpha$ -C $\alpha$  distance was calculated for residues A46 and A50, and this was used as the basis for the initial query of the loop database, collecting all loops with a C $\alpha$ -C $\alpha$  distance with 0.5 Å of the target, which returned 1946 potential loops. All loops were aligned by minimising the root mean square deviation of distances between corresponding atoms of the entering/exiting residues of the loop and A46 – A50 residues of Sav. Chimeric models of Sav with the candidate loop replacing residues A47 – A49, were created using ISAMBARD by replacing the residues in the polypeptide object representing chain A, with those of the aligned loop. As the number of potential loops was manageable, each model was visually examined for suitable candidate designs.

## S2. Cloning procedure, Protein expression and purification

### Cloning of (GGS)<sub>2</sub> loop mutants:

The gene sequences for streptavidin loop mutants containing one (GGS)<sub>2</sub>-inserts at positions G48...N49, T66...D67, R84...N85 or A117...N118 were ordered as double stranded DNA-string fragments (GeneArt® Strings™ DNA Fragments, invitrogen™ by life technologies™) containing a four base pair overhang (**ATAT**, **TATA**) at both ends (Table S1). In addition, new unique restriction sites were introduced into the gene sequences before and after each (GGS)<sub>2</sub>-insert (Figure S1). This allows a simple subsequent shuffling/combination of the loops (i.e. streptavidin mutants containing two (GGS)<sub>2</sub>-inserts at different positions; Table S8, entries 5-10).

**Table S1:** Sequences of streptavidin loop mutants containing a (GGS)<sub>2</sub>-insert.

| Entry | Position of insert | Sequence                                                                                                                                                                                                                                                                                                                                                                                                                                                                                                                                                            |
|-------|--------------------|---------------------------------------------------------------------------------------------------------------------------------------------------------------------------------------------------------------------------------------------------------------------------------------------------------------------------------------------------------------------------------------------------------------------------------------------------------------------------------------------------------------------------------------------------------------------|
| 1     | G48...N49          | ATATCATATGGCAAGCATGACGGGTGGCCAGCAGATGGGTCGTGATCAGGCAGGTATTACCGGCACC<br>TGGTATAATCAGCTGGGTAGCACCTTTATTGTTACCGCGGGCGCAGATGGTGCAGTACCGGCACGT<br>ACGAAAGCGCAGTTGGTGGCGGCAGCGGCCGAGCAATGCAGAAAGCCGTTATGTTCTGACCGGTC<br>GTTATGATAGCGCACCGGCAACCGATGGTAGCGGTACCGCACTGGGTTGGACCGTTGCATGGAAAAA<br>TAACTATCGTAATGCACATAGCGCAACCACGTGGTCAGGTCAGTATGTTGGTGGTGCAGAAGCACGC<br>ATTAACACCCAGTGGCTGCTGACCAGCGGCACCACCGAAGCAAATGCCTGGAAAAAGCACCTGGTTG<br>GTCATGATACCTTTACCAAAGTTAAACCGAGCGCAGCATCAATTGATGCAGCAAAAAAAGCCGGTGT<br>GAATAATGGTAATCCGCTGGATGCAGTTCAGCAGTAATAGGGATCCTATA    |
| 2     | T66...D67          | ATATCATATGGCAAGCATGACGGGTGGCCAGCAGATGGGTCGTGATCAGGCAGGTATTACCGGCACC<br>TGGTATAATCAGCTGGGTAGCACCTTTATTGTTACCGCGGGCGCAGATGGTGCAGTACCGGCACGT<br>ACGAAAGCGCAGTTGGTAATGCAGAAAGCCGTTATGTTCTGACCGGTCGTTATGATAGCGCACCGGC<br>AACCGGCGGCAGCGGCCGCGCAGTGGTAGCGGTACCGCACTGGGTTGGACCGTTGCATGGAAAAA<br>TAACTATCGTAATGCACATAGCGCAACCACGTGGTCAGGTCAGTATGTTGGTGGTGCAGAAGCACGC<br>ATTAACACCCAGTGGCTGCTGACCAGCGGCACCACCGAAGCAAATGCCTGGAAAAAGCACCTGGTTG<br>GTCATGATACCTTTACCAAAGTTAAACCGAGCGCAGCATCAATTGATGCAGCAAAAAAAGCCGGTGT<br>GAATAATGGTAATCCGCTGGATGCAGTTCAGCAGTAATAGGGATCCTATA    |
| 3     | R84...N85          | ATATCATATGGCAAGCATGACGGGTGGCCAGCAGATGGGTCGTGATCAGGCAGGTATTACCGGCACC<br>TGGTATAATCAGCTGGGTAGCACCTTTATTGTTACCGCGGGCGCAGATGGTGCAGTACCGGCACGT<br>ACGAAAGCGCAGTTGGTAATGCAGAAAGCCGTTATGTTCTGACCGGTCGTTATGATAGCGCACCGGC<br>AACCGATGGTAGCGGTACCGCACTGGGTTGGACCGTTGCATGGAAAAAATACTATCGTGGCGGCAGC<br>GGCGGCAGCAATGCACATAGCGCAACCACGTGGTCAGGTCAGTATGTTGGTGGTGCAGAAGCACGC<br>ATTAACACCCAGTGGCTGCTGACCAGCGGCACCACCGAAGCAAATGCCTGGAAAAAGCACCTGGTTG<br>GTCATGATACCTTTACCAAAGTTAAACCGAGCGCAGCATCAATTGATGCAGCAAAAAAAGCCGGTGT<br>GAATAATGGTAATCCGCTGGATGCAGTTCAGCAGTAATAGGGATCCTATA   |
| 4     | A117...N118        | ATATCATATGGCAAGCATGACGGGTGGCCAGCAGATGGGTCGTGATCAGGCAGGTATTACCGGCACC<br>TGGTATAATCAGCTGGGTAGCACCTTTATTGTTACCGCGGGCGCAGATGGTGCAGTACCGGCACGT<br>ACGAAAGCGCAGTTGGTAATGCAGAAAGCCGTTATGTTCTGACCGGTCGTTATGATAGCGCACCGGC<br>AACCGATGGTAGCGGTACCGCACTGGGTTGGACCGTTGCATGGAAAAAATACTATCGTAATGCACAT<br>AGCGCAACCACGTGGTCAGGTCAGTATGTTGGTGGTGCAGAAGCACGCATTAACACCCAGTGGCTGC<br>TGACCAGCGGCACCACCGAAGCAGGCGGCAGCGGCCGCGCAGCAATGCCTGGAAAAAGCACCTGGTTG<br>GTCATGATACCTTTACCAAAGTTAAACCGAGCGCAGCATCAATTGATGCAGCAAAAAAAGCCGGTGT<br>GAATAATGGTAATCCGCTGGATGCAGTTCAGCAGTAATAGGGATCCTATA |

The sequences collected in Table S1 were amplified by PCR (New England BioLabs® Q5® Hot

|                                   |    |     |             |         |         |     |
|-----------------------------------|----|-----|-------------|---------|---------|-----|
| Start                             | HF | DNA | Polymerase; | forward | primer: | 5'- |
| ATATCATATGGCAAGCATGACGGGTGGCC-3'; |    |     |             | reverse | primer: | 5'- |

TATAGGATCCCTATTAAAAACGCGCCAGCACG-3'). Amplified DNA was purified by precipitation from ethanol. DNA pellets were dissolved in water followed by digestion with restriction enzymes (New England BioLabs® NdeI + BamHI-HF, 37°C, 60 min; removal of the ATAT/TATA overhangs). Simultaneously, an empty pET30a vector (Novagen) was digested applying the same conditions. All digested samples were loaded onto an agarose gel (1% agarose) and the desired bands were cut out and purified (Macherey-Nagel NucleoSpin® Gel Clean-up kit). The inserts were then ligated into the digested pET30a vector (New England BioLabs® T4-DNA Ligase, 16°C, overnight, 10-fold molar excess of insert compared to vector). Ligated products were transformed into electro-competent TOP10 (DE3) *E.coli* cells and plated onto LB-agar plates containing kanamycin (50 µg/mL). Colonies were picked and overnight cultures were prepared (LB-medium, 37°C). Cells were harvested and plasmids were isolated (Macherey-Nagel NucleoSpin® Plasmid kit) and sequenced (Microsynth AG).

In order to introduce two (GGS)<sub>2</sub> loops into the same gene, the previously obtained single (GGS)<sub>2</sub> loop mutants were digested applying different restriction enzymes (Figure S1, Table S2). The digested backbones and inserts were combined in the desired way followed by re-ligation. The ligation products were then transformed and sequenced as described for the single (GGS)<sub>2</sub> mutants. Overexpression was performed using the *E.coli* TOP10 (DE3) strain (see annexes for SDS gel electrophoresis).

**Table S2:** Digestion of streptavidin loop sequences applying different restriction enzymes.

| entry | (GGS) <sub>2</sub> loop at position | restriction enzyme 1 | restriction enzyme 2 | used fragment |
|-------|-------------------------------------|----------------------|----------------------|---------------|
| 1     | G48...N49                           | AgeI                 | BamHI                | backbone      |
| 2     | T66...D67                           | AgeI                 | BamHI                | insert        |
| 3     | R84...N85                           | AgeI                 | BamHI                | insert        |
| 4     | A117...N118                         | AgeI                 | BamHI                | insert        |
| 5     | T66...D67                           | KpnI                 | BamHI                | backbone      |
| 6     | R84...N85                           | KpnI                 | BamHI                | insert        |
| 7     | A117...N118                         | KpnI                 | BamHI                | insert        |
| 8     | A117...N118                         | PmlI                 | NdeI                 | backbone      |
| 9     | R84...N85                           | PmlI                 | NdeI                 | insert        |

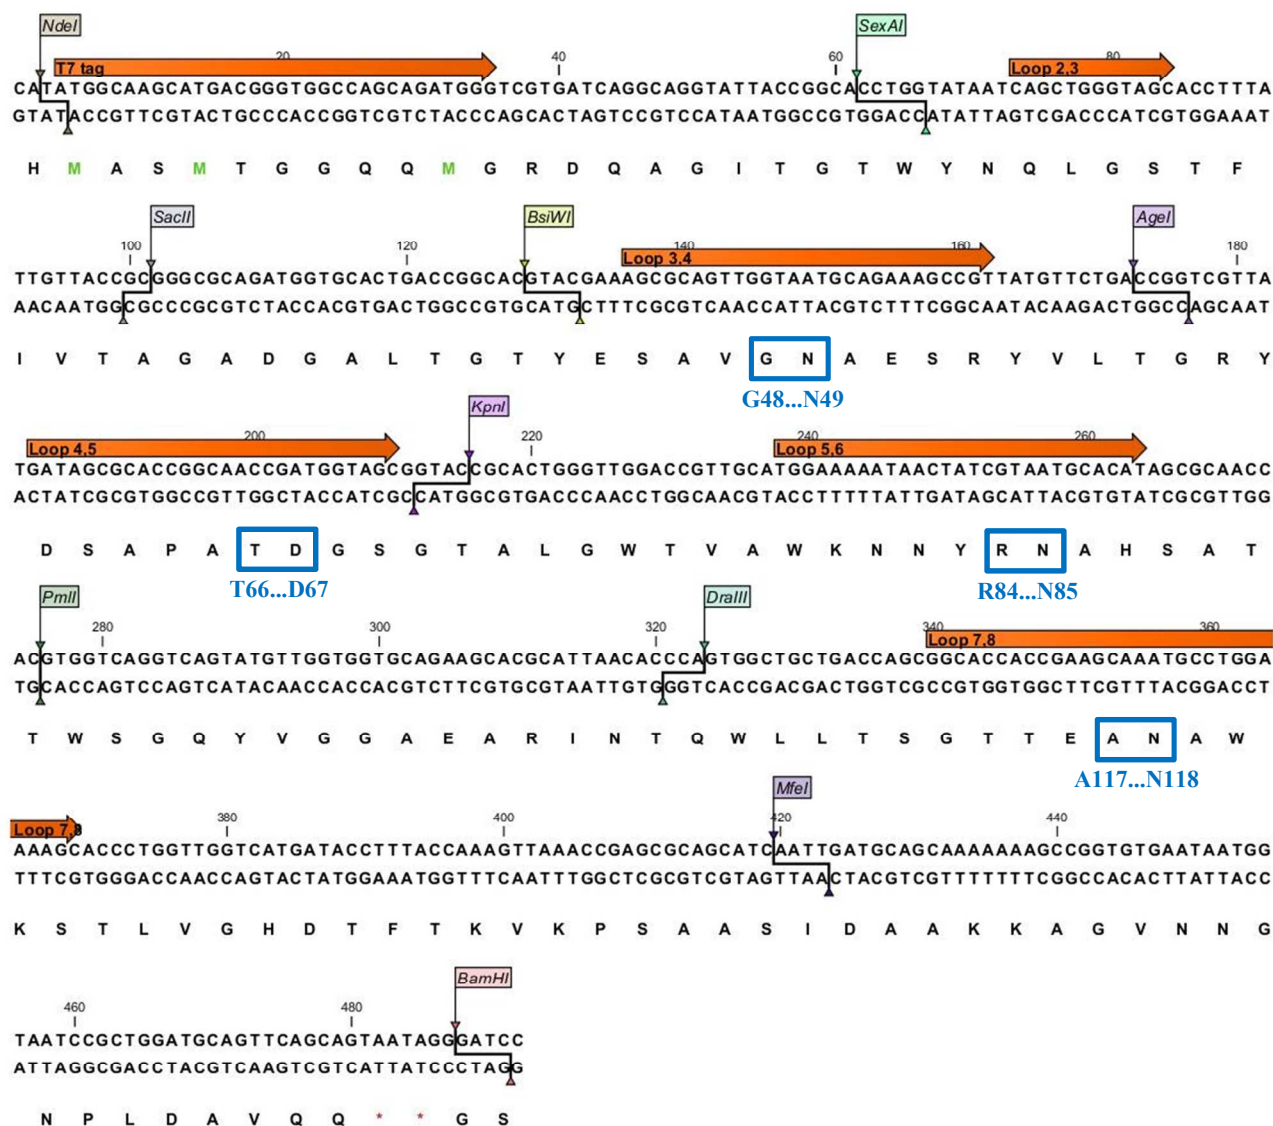

**Figure S1:** Designed streptavidin sequence containing unique restriction sites before and after the loops. Streptavidin sequence: double stranded DNA (upper lines), amino acids (lower line). Streptavidin loops are displayed as orange arrows. Positions for (GGX)<sub>2</sub>-inserts are labelled in blue.

In order to expand the diversity of the streptavidin loop mutants (GGX)<sub>n</sub>, the first serine residue in the loop ...G<sub>48</sub>-G-G-S-G-G-S-N<sub>49</sub>... was selected for mutagenesis. A primer containing the degenerate “NDT” codon was used, which can encode for 12 different amino acids including aliphatic, aromatic, charged, small and large residues (Phe, Leu, Ile, Val, Tyr, His, Asn, Asp, Cys, Arg, Gly and Ser). PCR was performed (New England BioLabs® Phusion® HF DNA polymerase; forward primer: 5'-GGTGGCGGCNDTGGCGGCAG-3'; reverse primer: 5'-

CTGCCGCAHNACCGCCACC-3') and mutants were analysed as described for the single (GGS)<sub>2</sub> mutants. Due to the high GC-content of the streptavidin sequence and the similarity of the GGX and the GGS motif, primers likely annealed at different position (3 amino acids shifted), leading to an elongation of the loop (Table S8, entries 11-18). Overexpression was performed using *E.coli* BL21 (DE3) strain (see annexes for SDS gel electrophoresis).

### **Expression procedure for (GGX)<sub>n</sub> loop mutants**

The preculture (10 mL LB-medium, 50 µg/mL kanamycin) was inoculated from glycerol stocks and incubated overnight (37°C, 200 rpm). The main culture (1000 mL LB-rich medium containing: 5.35 g/L yeast extract, 10.70 g/L bactotryptone, 1.77 g/L Na<sub>2</sub>HPO<sub>4</sub>, 1.70 g/L KH<sub>2</sub>PO<sub>4</sub>, 1.34 g/L NH<sub>4</sub>Cl, 0.36 g/L Na<sub>2</sub>SO<sub>4</sub>, 0.24 g/L MgSO<sub>4</sub>, 0.5 g/L glucose, 6.31 g/L glycerol and 50 µg/mL kanamycin) was inoculated with the preculture to a starting OD<sub>600</sub> of 0.1 and incubated for 2.5 h (37°C, 200 rpm). The temperature was then set to 20 °C and the culture was incubated for ~1 h. At an OD<sub>600</sub> of ~1.0, the main culture was induced with IPTG (final concentration: 40 µM) and incubated for an additional 20 h (20 °C, 200 rpm). The cell culture was centrifuged (4600 g, 4 °C, 10 min), the obtained cell pellet was resuspended in 20 mL lysis buffer (PBS-buffer (1x, pH 7.45) + 0.5mg/mL DNase-I + 1mg/mL lysozyme + 0.1 mM phenylmethylsulfonylfluoride) and incubated for 90 min (37 °C, 200rpm). The mixture was frozen (-20 °C, overnight), thawed again and incubated for 3 h (DNaseI digest, 25 °C, 200 rpm). The sample was centrifuged (4600 g, 4 °C, 40 min) and the supernatant (= cell free extract) was analyzed by SDS gel electrophoresis and purified using AKTA *prime* equipped with a sepharose iminobiotin coloumn.<sup>4-5</sup>

## Cloning, expression and purification for chimeric 2D\_Savs and MP\_Sav

pET24(+) plasmid encoding for T7-Tag 2D\_Sav's and MP\_Sav's were purchased from GenScript USA Inc. and used to transform *E. coli* BL21 (DE3) as expression strain. The consensus sequences of the 2D\_Savs are collected in Figure S2.

| Name | Consensus sequence                                                                                                  |
|------|---------------------------------------------------------------------------------------------------------------------|
| PPR  | -GNSVTYNTLISGLGKAGRLEEAL <b>FEEMKE</b> KGIVPDV-                                                                     |
| SH3  | -GRVR <u>WARAL</u> YDFEAL <b>EEDEL</b> GFSGEV <b>VEVL</b> DSSNPS <u>WWTGRL</u> HNK <b>LGLF</b> PANY <u>VAPMMR</u> - |
| AR   | -NGRT <b>PLHLA</b> ARNGHLE <b>VVKLL</b> EAGADVNAKDK-                                                                |
| HP   | -LS <b>DEDFK</b> AVFGMTRSAFANLPL <b>WKQ</b> HLKKEKGLF-                                                              |
| FDP  | - <b>SPLSE</b> ALTKANSPAEAYKASRGAG-                                                                                 |

**Figure S2.** Summary of the consensus sequences used in this study to generate chimeric 2D\_Sav family members. The secondary structures in the motifs ( $\alpha$ -helix and  $\beta$ -sheet) are highlighted in bold and underlined-bold, respectively.

Protein overexpression was performed using the autoinduction medium protocol described elsewhere.<sup>6-7</sup> After overexpression, the cell were harvested and lysed as described above. The supernatant, and the pellet were analysed by SDS gel electrophoresis, to determine the correct folding of the constructs using B4F (biotin-4-fluorescein),<sup>4</sup> Figure S3.

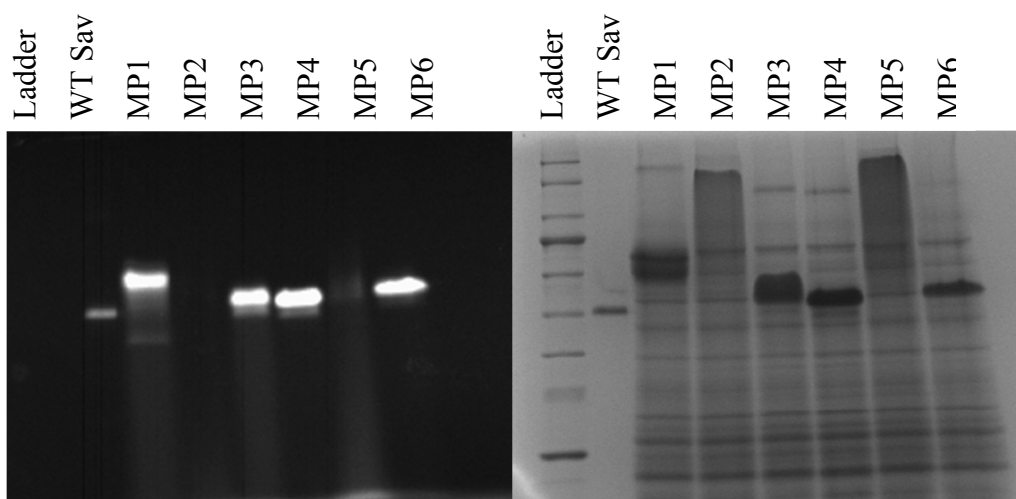

**Figure S3.** Example of SDS gel electrophoresis with MP\_Savs constructs. On the left, acrylamide gel exposed to UV-light. The fluorescent spots (left gel) highlight the biotin-binding capability of the chimeric Savs towards B4F. Coomassie blue-stained gel highlighting the efficient overexpression of various MP\_Savs (right gel).



Based on the folding behaviour of chimeric Savs, two purification protocols were applied (Table S3).

**Protocol 1:** The standard purification method, as reported elsewhere,<sup>5</sup> was applied for mutants overexpressed as soluble proteins. Briefly, samples were introduced in dialysis bags and equilibrated overnight in guanidinium chloride at 4 °C, then in TRIS 20 mM, pH = 7.4 for 12 h and finally dialyzed against the imminobiotin binding buffer. After 12 h, samples were purified with AKTA *prime*.<sup>5</sup>

**Protocol 2:** This procedure was applied for mutants that were overexpressed as inclusion bodies. After cell lysis, pellet (700 mg, wet weight) was dissolved in urea (3.4 ml of 8 M stock solution) for 1 h at 4 °C and then heated at 70 °C for 20 minutes. The protein solution was slowly added into 200 ml of refolding buffer (MES 50 mM, pH = 6.0, NaCl 9.6 mM, KCl 0.4 mM, MgCl<sub>2</sub> · 6H<sub>2</sub>O 2 mM, CaCl<sub>2</sub> 2 mM, arginine 0.5 M and 0.05% polyethylene glycol 3.400) while gently vortexing and incubated (1 h at 4 °C). The resulting solution was dialyzed overnight versus imminobiotin binding buffer and purified with AKTA *prime*.<sup>5</sup>

**Table S3.** Expression level and purification protocol used for chimeric Savs.

| entry | Chimera Sav <sup>a,b</sup> | purification method | mg/l | MW <sub>th</sub> (g/mol) <sup>c</sup> | MW <sub>measured</sub> (g/mol) <sup>c</sup> |
|-------|----------------------------|---------------------|------|---------------------------------------|---------------------------------------------|
| 1     | PPR_159                    | 1                   | 60,2 | 20515.5                               | 20515.8                                     |
| 2     | SH3_46-52                  | 2                   | nd   | 22877.2                               | nd                                          |
| 3     | SH3_63_70                  | nd                  | nd   | 22819.2                               | nd                                          |
| 4     | SH3_82_87                  | nd                  | nd   | 22843.1                               | nd                                          |
| 5     | SH3_113_117                | 2                   | 9,4  | 23016.4                               | 23016.7                                     |
| 6     | SH3_159                    | 1                   | 42   | 23347.7                               | 23347.9                                     |
| 7     | AR_46_52                   | 2                   | 3,8  | 19457.4                               | nd                                          |
| 8     | AR_64_70                   | 2                   | 4    | 19496.5                               | 19539.4                                     |
| 9     | AR_81_84                   | nd                  | nd   | 19650.5                               | nd                                          |
| 10    | AR_115_117                 | 2                   | 1,5  | 19798.8                               | nd                                          |
| 11    | HP_46_52                   | 1                   | 40   | 20061.0                               | 20061.6                                     |
| 12    | HP_63_70                   | 2                   | 1    | 19960.0                               | nd                                          |
| 13    | HP_64_70                   | 1                   | 9,5  | 20045.2                               | 20045.0                                     |
| 14    | HP_82_84                   | 1                   | 1,9  | 20325.4                               | nd                                          |
| 15    | HP_113_117                 | nd                  | nd   | 20157.3                               | nd                                          |
| 16    | FDP_46_52                  | 1                   | 66   | 18313.0                               | 18313.3                                     |
| 17    | FDP_64_70                  | 2                   | 3,5  | 18352.1                               | 18394.8                                     |
| 18    | FDP_81_84                  | 1                   | 4,2  | 18506.2                               | nd                                          |
| 19    | FDP_115_117                | 2                   | 1,5  | 18654.4                               | nd                                          |
| 20    | MP 1                       | 1                   | 13,5 | 16484.0                               | 16483.5                                     |
| 21    | MP 2                       | not tested          | nd   | 16526.0                               | nd                                          |
| 22    | MP 3                       | 1                   | 16,0 | 16645.1                               | 16645.0                                     |
| 23    | MP 4                       | 1                   | 27,4 | 16625.1                               | 16625.0                                     |
| 24    | MP 5                       | not tested          | nd   | 16754.3                               | nd                                          |
| 25    | MP 6                       | 1                   | 10   | 16792.1                               | 16792.6                                     |
| 26    | MP 7                       | 1                   | 16,1 | 17064.6                               | 17065.0                                     |
| 27    | MP 8                       | not tested          | nd   | 17081.6                               | nd                                          |
| 28    | MP 9                       | 1                   | 27,3 | 17098.6                               | 17099.5                                     |
| 29    | MP 10                      | not tested          | nd   | 17046.7                               | nd                                          |
| 30    | MP 11                      | 1                   | 25,2 | 17101.6                               | 17102.0                                     |
| 31    | MP 12                      | 1                   | 24   | 17260.7                               | 17261.2                                     |
| 32    | MP 1_ <i>K-A_K-F</i>       | not tested          | nd   | 16445.9                               | nd                                          |
| 33    | MP 3_ <i>K-A</i>           | 1                   | 12,9 | 16588.0                               | 16588.1                                     |
| 34    | MP 3_ <i>K-F</i>           | 1                   | 11,5 | 16664.1                               | 16663.6                                     |
| 35    | MP 6_ <i>K-A_R-F</i>       | 1                   | 9,0  | 16726.0                               | 16725.9                                     |
| 36    | MP 9_ <i>K-F</i>           | 1                   | 14,0 | 17117.0                               | 17117.5                                     |
| 37    | MP 12_ <i>R-A_K-F</i>      | 1                   | 12,2 | 17194.0                               | 17195.0                                     |
| 38    | MP 3_K121F                 | 1                   | 12,1 | 16664.0                               | 16664.1                                     |
| 39    | MP 3_ <i>K-A-K121F</i>     | 1                   | 18,4 | 16607.0                               | 16607.1                                     |

<sup>a</sup> The numbering of the residues of Sav was kept identical to the Sav WT numbering, even though the insertion may be placed before the position of the mutation. <sup>b</sup> Italicized one letter aminoacid abbreviations designate cationic aminoacids within the inserted loops that were mutated to either A or F to probe the effect of the charge on the catalytic performance (See Table 3 for details). <sup>c</sup> Calculated molecular weight of the monomer.

The constructs were characterized by ESI-TOF mass-spectroscopy (see Annexes).

### S3. General procedures and analytical methods

#### Asymmetric transfer hydrogenation

**Procedure.** 10  $\mu$ l of proteins stock solution in Milli-Q H<sub>2</sub>O (200  $\mu$ M free binding site), was added to 185  $\mu$ l of buffer (MOPS 0,66 M, pH = 7,5 and formate 3,33 M) followed by the addition of 5  $\mu$ l of the biotinylated metal complex [Cp\*Ir(biot-L)Cl] **1** from a stock solution (0.4 mM in DMSO). The solution was mixed for 20 min at 37 °C and 800 rpm in a thermo-mixer for precomplexation. Finally, 5  $\mu$ l of substrate **4** or **6** stock solution (400 mM in DMSO) was added and the mixture was stirred at 37 °C for 16 h. Subsequently, 100  $\mu$ l of an NaOH 20 % solution was added to the reaction mixture, followed by the addition of 1 ml of CH<sub>2</sub>Cl<sub>2</sub>. After mixing, the organic phase was separated and dried with anhydrous Na<sub>2</sub>SO<sub>4</sub>. Solids were separated through centrifugation (2 min at 21 000 g), and the supernatant was analyzed by using HPLC or GC.

Catalytic reactions performed with substrate **4** were analysed by HPLC using Chiral stationary phase (CHIRALPAK IC 250 x 4.6 mm, 5  $\mu$ m; CH<sub>2</sub>Cl<sub>2</sub>/*i*-PrOH/DEA 99,5:0,5:0.1, 1 ml/min, 25 °C, detection at 265 nm).  $t_{\text{ret}} = 7.5$  min ((*S*)-**5**),  $t_{\text{ret}} = 8.4$  min (**4**),  $t_{\text{ret}} = 11.6$  min ((*R*)-**5**). Conversions for substrate **4** were determined by comparison of the signal area of product and substrate peaks under consideration of the experimentally determined response factor (1.26).<sup>8</sup>

The conversion of substrate **6** was determined by GC-FID (Agilent J&W CAM, 30 m  $\times$  0.32 mm, 0.25  $\mu$ m; 150 °C isotherm, 1.7 ml He/min; injector: 250 °C, split 100; detector: 240 °C).  $t_{\text{ret}} = 3.64$  min (amine **7**),  $t_{\text{ret}} = 3.30$  min (imine **6**).

For ee determination, the product **7** was converted to the corresponding trifluoroacetamide. Trifluoroacetic anhydride (TFAA, 200  $\mu$ l) was added to the GC-samples used for the determination of the conversion and the volatiles were removed to near dryness using a gentle stream of N<sub>2</sub>. The residue was dissolved in a small amount of CH<sub>2</sub>Cl<sub>2</sub> (30-100  $\mu$ l) and analyzed by GC-FID on a chiral stationary phase (Agilent CP-Chirasil-DEX CB, 25 m  $\times$  0.25 mm, 0.25  $\mu$ m; 140 °C isothermal, 1.7 ml He/min; injector: 300 °C, split 100; detector: 275 °C). Product **7**:  $t_{\text{ret}} = 9.1$  min ((*S*)-**7**),  $t_{\text{ret}} = 9.4$  min ((*R*)-**7**). Assignment of absolute configuration was based on literature data.<sup>9</sup>

**Table S4.** ATHase results obtained for the 2D\_Sav combined with [Cp\*Ir(biot-L)Cl] **1**.<sup>a</sup> Error margins in square brackets.

| entry | 2D_Sav      | substrate | ee ( <i>R</i> ) | TON       |
|-------|-------------|-----------|-----------------|-----------|
| 1     | No protein  | <b>4</b>  | 0               | 197 [0.2] |
| 2     | No protein  | <b>6</b>  | 0               | 0         |
| 3     | Wt Sav      | <b>4</b>  | 45 [0.5]        | 170 [2.0] |
| 4     | Wt Sav      | <b>6</b>  | 76 [1.2]        | 22 [0.7]  |
| 5     | HP_46-52    | <b>4</b>  | 59 [0.6]        | 223 [2.2] |
| 6     | FDP_46-52   | <b>4</b>  | 51 [1.0]        | 340 [5.1] |
| 7     | HP_46-52    | <b>6</b>  | 80 [1.8]        | 162 [2.3] |
| 8     | FDP_46-52   | <b>6</b>  | 82 [2.7]        | 158 [2.5] |
| 9     | HP_64-70    | <b>4</b>  | 22 [2.0]        | 14 [1.2]  |
| 10    | SH3_113-117 | <b>4</b>  | 18 [0.7]        | 12 [0.6]  |
| 11    | SH3_159     | <b>4</b>  | 52 [1.1]        | 50 [0.3]  |
| 12    | PPR_159     | <b>4</b>  | 48 [0.4]        | 55 [1.7]  |
| 13    | AR_64-70    | <b>4</b>  | 3 [nd]          | 5 [nd]    |

<sup>a</sup> reaction conditions: substrate 10 mM, 16 h, 37°C, [Cp\*Ir(biot-L)Cl] **1** 10 μM, Sav's Free Binding Site (FBS) 20 μM, MOPS 0,6 M, pH = 7,5, formate 3 M, V<sub>tot</sub> = 200 μL.

**Table S5.** ATHase results obtained for the MP\_Sav introduced between position A46 and A50 combined with [Cp\*Ir(biot-L)Cl] **1**.<sup>a</sup> Error margins in square brackets.

| entry | MP_Sav <sup>b,c</sup> | substrate | ee ( <i>R</i> )        | TON       |
|-------|-----------------------|-----------|------------------------|-----------|
| 1     | No protein            | <b>4</b>  | 0                      | 197[0.2]  |
| 2     | No protein            | <b>6</b>  | 0                      | 0         |
| 3     | Wt Sav                | <b>4</b>  | 45 [0.5]               | 170 [2.0] |
| 4     | Wt Sav                | <b>6</b>  | 76 [1.2]               | 22 [0.7]  |
| 5     | Sav K121F             | <b>4</b>  | -13 ( <i>S</i> ) [0.1] | 970 [8.7] |
| 6     | MP 1                  | <b>4</b>  | 48 [1.1]               | 9 [0.1]   |
| 7     | MP 3                  | <b>4</b>  | 53 [2.3]               | 6 [0.2]   |
| 8     | MP 4                  | <b>4</b>  | 42 [0.1]               | 67 [2.5]  |
| 9     | MP 9                  | <b>4</b>  | 53 [0.5]               | 82 [3.4]  |
| 10    | MP 11                 | <b>4</b>  | 45 [0.4]               | 61 [5.5]  |
| 11    | MP 12                 | <b>4</b>  | 62 [0.2]               | 15 [1.6]  |
| 12    | MP 3_ <i>K-A</i>      | <b>4</b>  | 46 [0.9]               | 192 [3.0] |
| 13    | MP 3_ <i>K-F</i>      | <b>4</b>  | 33 [2.1]               | 168 [5.5] |
| 14    | MP3_ <i>K-A-K121F</i> | <b>4</b>  | 14 [0.2]               | 462 [8.7] |
| 15    | MP6_ <i>K-A,R-F</i>   | <b>4</b>  | 46 [1.5]               | 146 [1.7] |
| 16    | MP 9_ <i>K-F</i>      | <b>4</b>  | 49 [0.4]               | 198 [2.1] |
| 17    | MP12_ <i>R-A-K-F</i>  | <b>4</b>  | 53 [0.6]               | 56 [1.4]  |
| 18    | MP 3_K121F            | <b>4</b>  | 15 [0.6]               | 568 [9.3] |
| 19    | MP 3_ <i>K-A</i>      | <b>6</b>  | 79 [1.6]               | 57 [2.5]  |
| 20    | MP 6_ <i>K-A_R-F</i>  | <b>6</b>  | 77 [1.5]               | 100 [1.9] |
| 21    | MP 9_ <i>K-F</i>      | <b>6</b>  | 80 [2.0]               | 71 [1.0]  |

<sup>a</sup> reaction conditions: substrate 10 mM, 16 h, 37°C, [Cp\*Ir(biot-L)Cl] **1** 10 μM, Sav's Free Binding Site (FBS) 20 μM, MOPS 0,6 M, pH = 7,5, formate 3 M, V<sub>tot</sub> = 200 μL. <sup>b</sup> The numbering of the residues of Sav was kept identical to the WT numbering, even though the insertion may be placed before the position of the mutation. <sup>c</sup> Italicized one letter aminoacid abbreviations designate cationic aminoacids within the inserted loops that were mutated to either A or F to probe the effect of the charge on the catalytic performance (See Table 3 for details).

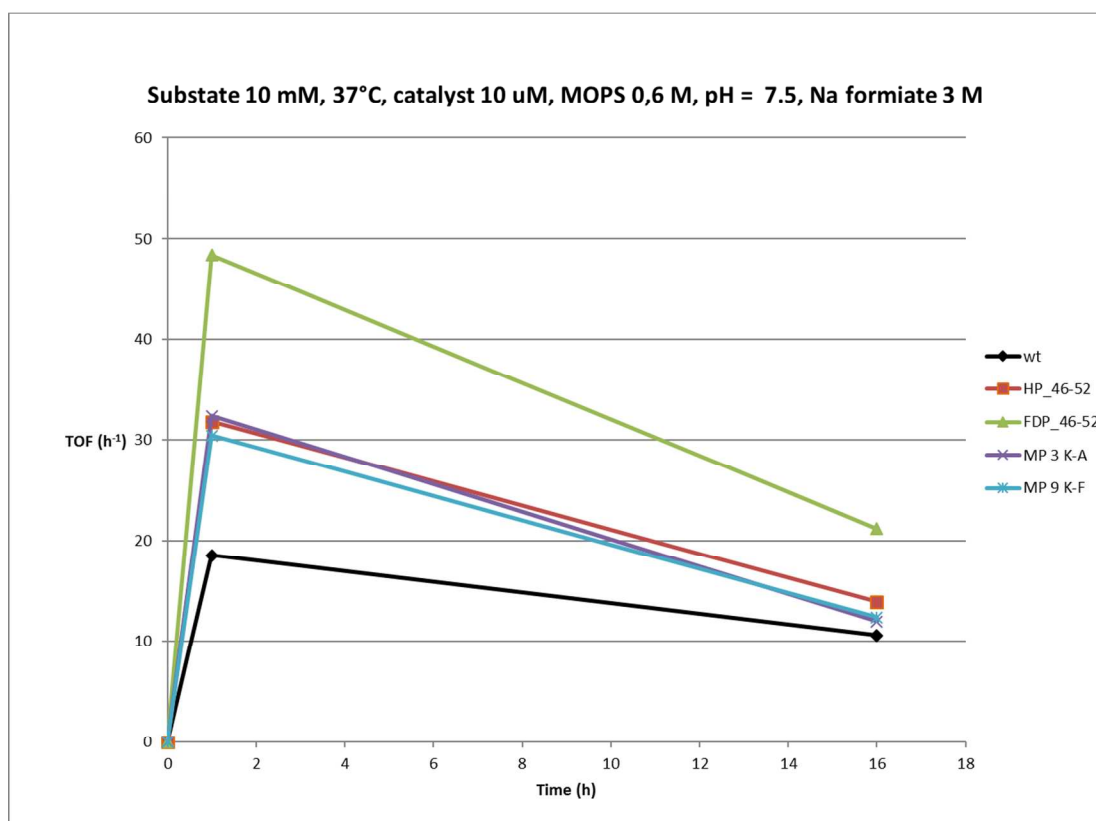

**Figure S4.** Qualitative kinetic data in ATH of substrate 4.

## Ring closing metathesis

**Procedure.** In a 1.2 mL glass vial, 10  $\mu$ l of protein stock solution (400  $\mu$ M in MQ water) and 5  $\mu$ l **biot Ru 2** (400  $\mu$ M in DMSO) were added to 85  $\mu$ l of reaction buffer (100 mM AcOH/AcONa, 0.5 M  $\text{MgCl}_2$  pH = 4.0) and incubated at 37  $^\circ\text{C}$  for 20 min. After incubation, the substrate **8** (100  $\mu$ l of a 20 mM stock solution) was added to the reaction mixture and the reaction was stirred at 37  $^\circ\text{C}$  for 16 hours at 1000 rpm. After reaction, methanol (750  $\mu$ l) and the internal standard (50  $\mu$ l of a 100  $\mu$ M stock solution) were added to the reaction mixture and transferred to Eppendorf tubes for centrifugation (10 min, 10000 g). The supernatant (20  $\mu$ l) was then transferred into HPLC vials containing MQ water (980  $\mu$ l) and the sample analysed by UPLC-MS for the quantification of product **9**.

Samples were analysed by UPLC-MS for the quantification of product **9**,  $t_{\text{ret}} = 0.96$  min.

The calibration curve was established using **9-d<sub>9</sub>** (i.e containing a perdeuterated  $-\text{N}(\text{CD}_3)_3$  moiety) as internal standard. Samples were prepared in triplicate using a concentration range of 0-1  $\mu$ M of the metathesis product **9** and a fixed concentration of internal standard **9-d<sub>9</sub>** (500 nM) and analysed by UPLC-MS. The linear regression was obtained by plotting the product/standard ratio integration as a function of the product concentration as reported in Figure S5.

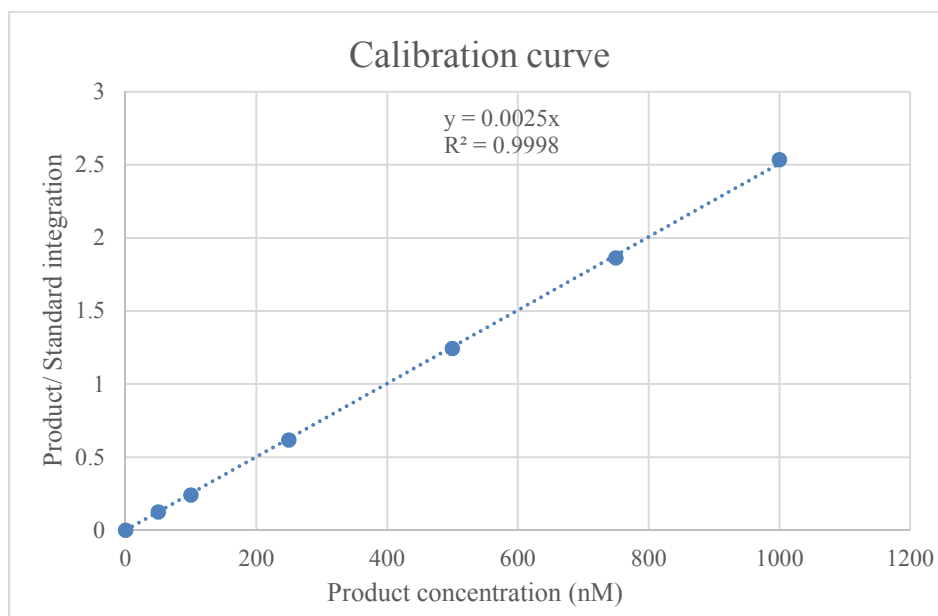

**Figure S5.** Calibration curve for the quantification of the ring closing metathesis reaction using **9-d<sub>9</sub>** as internal standard.

**Table S6.** Results for ring closing metathesis reaction using 2D\_Sav and MP\_Sav.<sup>a</sup> Error margins in square brackets.

| entry | protein <sup>b,c</sup> | TON       |
|-------|------------------------|-----------|
| 1     | No protein             | 38 [1.5]  |
| 2     | WT Sav                 | 87 [1.1]  |
| 3     | K121F                  | 105 [0.1] |
| 4     | HP_64-70               | 56 [0.5]  |
| 5     | PPR_159                | 64 [0.7]  |
| 6     | HP_46-52               | 18 [0.6]  |
| 7     | AR_64-70               | 14 [0.9]  |
| 8     | SH3_113-117            | 28 [1.7]  |
| 9     | SH3_159                | 22 [0.3]  |
| 10    | FDP_46-52              | 18 [0.3]  |
| 11    | MP 1                   | 19 [0.3]  |
| 12    | MP 3                   | 49 [0.8]  |
| 13    | MP 3_ <i>K-A</i>       | 61 [0.1]  |
| 14    | MP 3_ <i>K-F</i>       | 59 [1.2]  |
| 15    | MP 4                   | 42 [0.2]  |
| 16    | MP 6_ <i>K-A_R-F</i>   | 16 [0.8]  |
| 17    | MP 9                   | 47 [1.5]  |
| 18    | MP 9_ <i>K-F</i>       | 40 [1.2]  |
| 19    | MP 11                  | 49 [0.5]  |
| 20    | MP 12                  | 21 [0.2]  |
| 21    | MP 3_ <i>K-A-K121F</i> | 98 [3.0]  |
| 22    | MP 3_K121F             | 88 [1.6]  |
| 23    | MP 12_ <i>R-A_K-F</i>  | 25 [0.4]  |

<sup>a</sup> reaction conditions: substrate **8** 10 mM, **biot-Ru 2** 10  $\mu$ M, 16 h, 37°C, Chim\_Sav and MP\_Sav 20  $\mu$ M free binding site, acetate buffer 100 mM, MgCl<sub>2</sub> 0.5 M pH = 4.0, V<sub>tot</sub> = 200  $\mu$ L. <sup>b</sup> The numbering of the residues of Sav were kept as the WT numbering, even though the insertion may be placed before the position of the mutation. <sup>c</sup> Italicized one letter aminoacid abbreviations designate cationic aminoacids within the inserted loops that were mutated to either A or F to probe the effect of the charge on the catalytic performance (See Table 3 for details).

## Anion- $\pi$ catalysis

**Procedure.** Stock solutions of substrates **10** (40 mM), **11** (400 mM) and **biot NDI 3** (2 mM) were prepared in CD<sub>3</sub>CN. Solutions of substrates **10** should be freshly prepared as decarboxylation to afford **13 D** build up upon aging. Solutions were prepared by mixing successively streptavidin WT or mutants (100  $\mu$ L, 2 mM, glycine buffer pH 3, 0.2  $\mu$ mol), biotinylated ligand **3** (50  $\mu$ L, 0.1  $\mu$ mol), substrates **10** (25  $\mu$ L, 1  $\mu$ mol) and **11** (25  $\mu$ L, 10  $\mu$ mol)



and stirred at 20 °C. After 24h, the mixture was extracted with CDCl<sub>3</sub> (0.7 mL), dried over Na<sub>2</sub>SO<sub>4</sub>, filtered and analyzed by <sup>1</sup>H-NMR Figure S6.

Integrals associated with the protons alpha to the carbonyl group of the addition product **12 A** ( $\delta$  3.01 ppm; d, 2H) were compared to the combined integration of all –OCH<sub>3</sub> protons present in the substrates and products (i.e., from  $\delta$  3.84–3.79 ppm) to determine conversion of the reaction. The spectroscopic data obtained for product **12 A** were identical to the ones reported in the literature.<sup>10</sup> Crude mixtures were analysed by chiral HPLC, (*i.e.*, column: CHIRALPAK ID column; mobile phase: *n*-Hexane/*i*-PrOH 60/40, 0.5 mL/min, rt; detection: 254 nm, Figure S7).

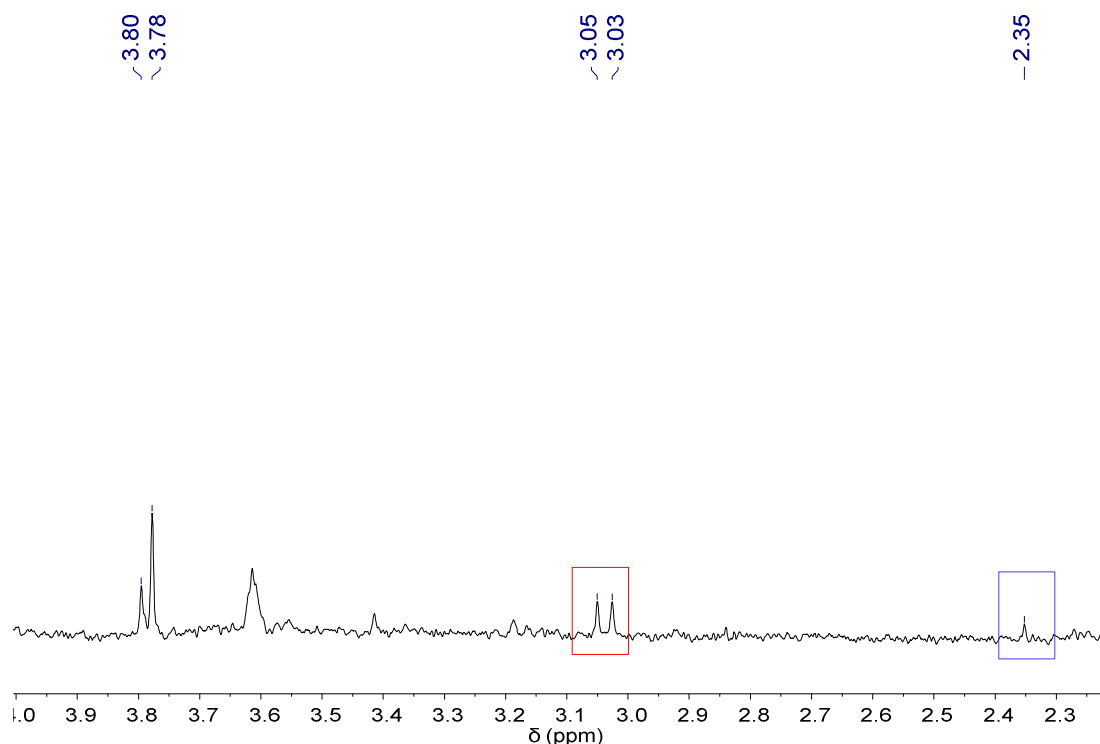

**Figure S6.** <sup>1</sup>H NMR spectra of a mixture of **10** (5 mM), **11** (50 mM) and PPR\_159 · **biot-NDI 3** (10% mol) in glycine buffer/CD<sub>3</sub>CN 1:1 at 20 °C extracted in CDCl<sub>3</sub>. The red rectangle highlights the diagnostic peak corresponding to the protons alpha to the carbonyl group of the addition product **12 A**, the blue rectangle highlights the methyl protons from the decarboxylation product **13 D**.

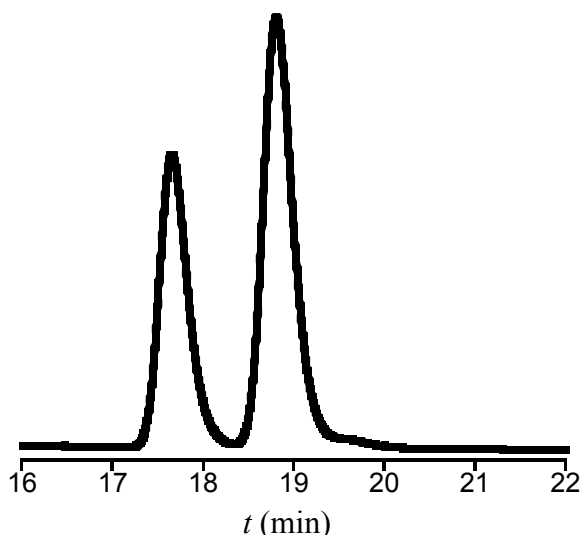

**Figure S7.** Chiral HPLC traces obtained using CHIRALPAK ID column (*n*-hexane/*i*-PrOH 60:40, rt, 0.5 mL/min, 254 nm) for crude mixture PPR\_159 · **biot-NDI 3** (22 % *ee*).

**Table S7.** Results obtained for anion- $\pi$  catalysis using **biot-NDI 3** · 2D\_Sav or **biot-NDI 3** · MP\_Sav.<sup>a</sup>

| entry | Sav <sup>b,c</sup>      | Yield % | 12A/13D | ee (%) |
|-------|-------------------------|---------|---------|--------|
| 1     | WT Sav                  | 60      | >30     | 41     |
| 2     | FDP_46-52               | 0       | nd      | nd     |
| 3     | HP_46-52                | 0       | nd      | nd     |
| 4     | PPR_159                 | 57      | >30     | 22     |
| 5     | MP 3_ <i>K-A</i>        | 20      | >30     | 0      |
| 6     | MP 3_ <i>K-A</i> _K121F | 55      | >30     | 0      |
| 7     | MP 3_K121F              | 51      | >30     | 0      |
| 8     | MP 4                    | 12      | >30     | 0      |
| 9     | MP 6_ <i>K-A</i> _R-F   | 7       | nd      | 0      |
| 10    | MP 9                    | 23      | >30     | 0      |
| 11    | MP 9_ <i>K-F</i>        | 45      | >30     | 0      |
| 12    | MP 11                   | 24      | >30     | 0      |
| 13    | MP 12                   | traces  | nd      | 0      |
| 14    | MP 12_ <i>R-A</i> _K-F  | 61      | >30     | 0      |

<sup>a</sup>Reaction conditions: **biot-NDI 3** 10 mol%, Sav's FBS 20 mol %, CD<sub>3</sub>CN/Glycine buffer pH = 3, substrate **10** 5 mM, substrate **11** 50 mM. <sup>b</sup> The numbering of the residues of Sav were kept as that of WT Sav, even though the insertion may be placed before the position of the mutation. <sup>c</sup> Italicized one letter aminoacid abbreviations designate cationic aminoacids within the inserted loops that were mutated to either A or F to probe the effect of the charge on the catalytic performance (See Table 3 for details).

## S4. Annexes

**Table S8:** Overview of the streptavidin mutants containing (GGX)<sub>n</sub>-inserts and their expression yields.

| Entry | Name   | Position(s)              | Sequence of insert(s)      | Expression        | Mass of monomer <sup>a</sup> [Da] |                         | Cell free extract           |                           | Purified protein |                           |
|-------|--------|--------------------------|----------------------------|-------------------|-----------------------------------|-------------------------|-----------------------------|---------------------------|------------------|---------------------------|
|       |        |                          |                            |                   | Calculated                        | Determined <sup>b</sup> | FBBS <sup>f</sup> [nmol/mg] | Yield <sup>c</sup> [mg/l] | FBBS/Tetramer    | Yield <sup>d</sup> [mg/l] |
| 1     | 48     | G48...N49                | GGSGGS                     | Soluble tetramer  | 16827.3                           | 16828.1                 | 2.7                         | 549.6                     | nd.              | 13.8                      |
| 2     | 66     | T66...D67                | GGSGGS                     | Soluble tetramer  | 16827.3                           | 16827.7                 | 2.7                         | 557.0                     | nd.              | 16.3                      |
| 3     | 84     | R84...N85                | GGSGGS                     | Soluble tetramer  | 16827.3                           | 16828.0                 | 2.8                         | 529.4                     | nd.              | 13.0                      |
| 4     | 117    | A117...N118              | GGSGGS                     | Soluble tetramer  | 16827.3                           | -                       | 2.6                         | 235.4                     | -                | -                         |
| 5     | 48+66  | G48...N49<br>T66...D67   | GGSGGS<br>GGSGGS           | Soluble tetramer  | 17229.7                           | °                       | 6.2                         | 338.0                     | nd.              | 1.5                       |
| 6     | 48+84  | G48...N49<br>R84...N85   | GGSGGS<br>GGSGGS           | Soluble tetramer  | 17229.7                           | °                       | 5.6                         | 489.0                     | nd.              | 0.9                       |
| 7     | 48+117 | G48...N49<br>A117...N118 | GGSGGS<br>GGSGGS           | Soluble tetramer  | 17229.7                           | -                       | 0.2                         | 363.0                     | -                | -                         |
| 8     | 66+84  | T66...D67<br>R84...N85   | GGSGGS<br>GGSGGS           | Insoluble monomer | 17229.7                           | -                       | -                           | -                         | -                | -                         |
| 9     | 66+117 | T66...D67<br>A117...N118 | GGSGGS<br>GGSGGS           | Soluble tetramer  | 17229.7                           | -                       | 0.2                         | 383.0                     | -                | -                         |
| 10    | 84+117 | R84...N85<br>A117...N118 | GGSGGS<br>GGSGGS           | Insoluble monomer | 17229.7                           | -                       | -                           | -                         | -                | -                         |
| 11    | Loop 1 | G48...N49                | GGDGGNGSGGLGGCGGS          | Soluble tetramer  | 17729.2                           | -                       | 19.4                        | 678.0                     | -                | -                         |
| 12    | Loop 2 | G48...N49                | GGNGGNGGGGVVGS             | Soluble tetramer  | 17466.9                           | 17468.3                 | 22.0                        | 580.0                     | nd.              | 55.0                      |
| 13    | Loop 3 | G48...N49                | GGIGSGGGGGHGGRGGGGV<br>GGS | Soluble tetramer  | 18131.6                           | -                       | 12.3                        | 619.0                     | -                | -                         |
| 14    | Loop 4 | G48...N49                | GGNGSGGGGGGGSGSGGS         | Soluble tetramer  | 17800.2                           | -                       | 12.3                        | 596.0                     | -                | -                         |
| 15    | Loop 5 | G48...N49                | GGRGGGGHGGCGGVVGS          | Soluble tetramer  | 17749.3                           | -                       | 17.0                        | 1039.0                    | -                | -                         |
| 16    | Loop 7 | G48...N49                | GGDGGGS                    | Soluble tetramer  | 16855.3                           | -                       | 15.8                        | 630.0                     | -                | -                         |
| 17    | Loop 8 | G48...N49                | GGCGSGGGGGGGGGCGG<br>S     | Soluble tetramer  | 17775.2                           | -                       | 10.8                        | 544.0                     | -                | -                         |
| 18    | Loop 9 | G48...N49                | GGCGGIGGS                  | Soluble tetramer  | 17070.6                           | -                       | 15.4                        | 519.0                     | -                | -                         |

<sup>a</sup>Mass of the streptavidin monomer without the N-terminal methionine. <sup>b</sup>Mass was only determined for purified proteins. <sup>c</sup>Dried cell free extract (CFE) powder per 1 L culture. <sup>d</sup>Isolated purified protein per 1 L culture. <sup>e</sup>Peak corresponding to desired product mass was not detected in the MS analysis. <sup>f</sup>Amount of free biotin binding sites per mass CFE.

### (Gly-Gly-Ser)<sub>2</sub> motif:

Example sequence of a streptavidin loop mutant with the (GGX)<sub>2</sub> motif between residues G48 and N49 (including T7-tag):

H<sub>2</sub>N—

ASMTGGQQMGRDQAGITGTWYNQLGSTFIVTAGADGALTGTYESAVG<sub>48</sub>GGSGGSN<sub>49</sub>AESRYVLTGRYDSAPATDGS GTALGWTVAWKNNYRNAHS  
ATTWSGQYVGAEARINTQWLLTSGTTEANAWKSTLVGHDTFTKVKPSAASIDAAKAGVNNGNPLDAVQQ—CO<sub>2</sub>H

SDS gel electrophoresis of CFEs (soluble fraction) for (GGS)<sub>2</sub> mutants:

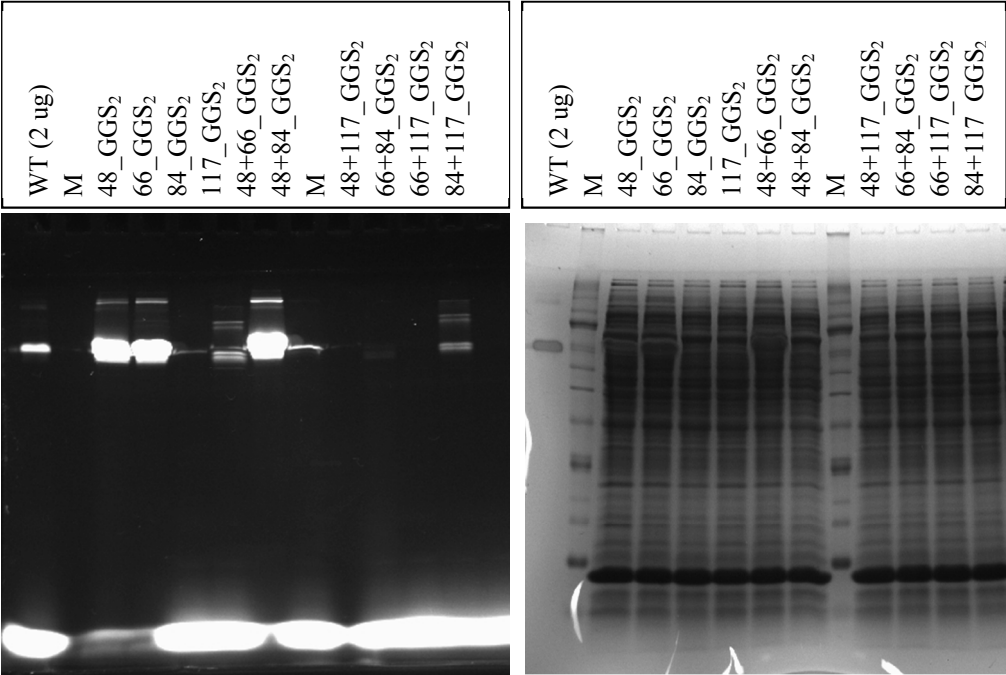

SDS gel electrophoresis of CFEs (soluble fraction) for (GGS)<sub>n</sub> mutants:

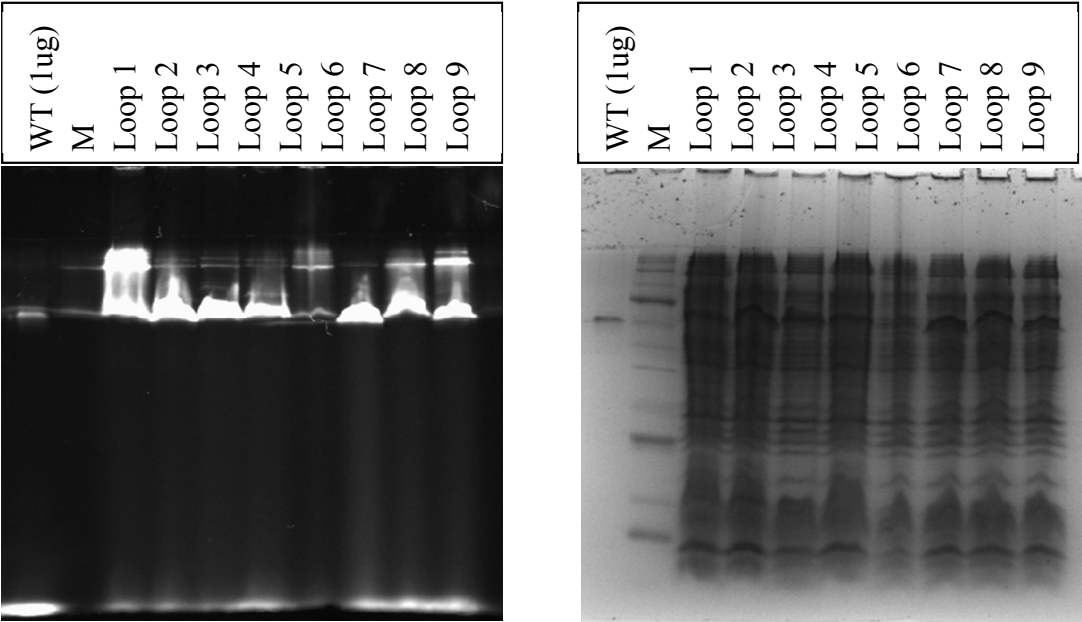

ESI-TOF mass spectrum (after deconvolution) of the purified chimeric streptavidins

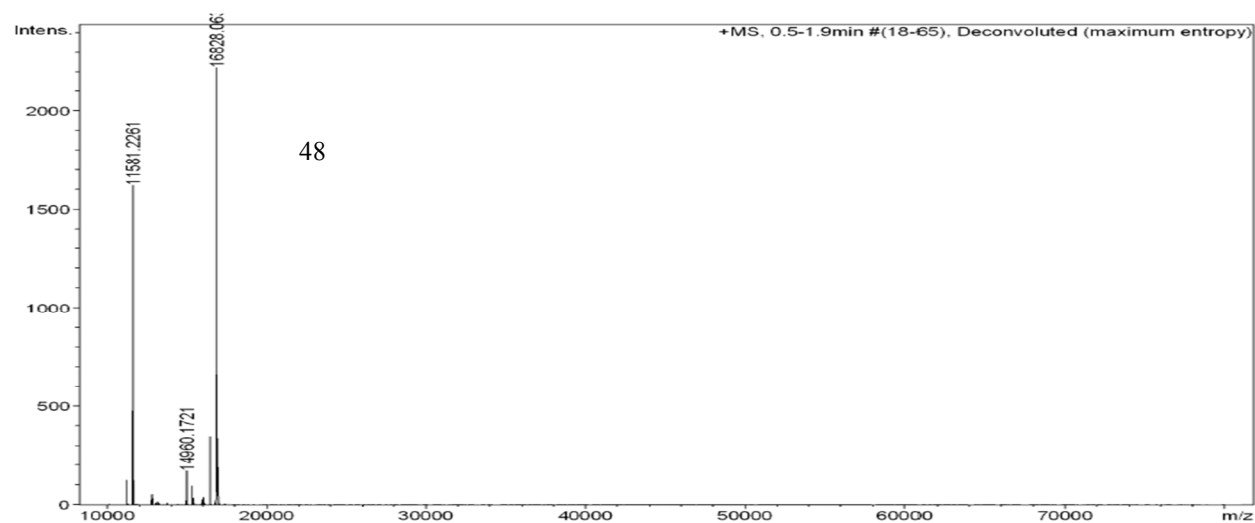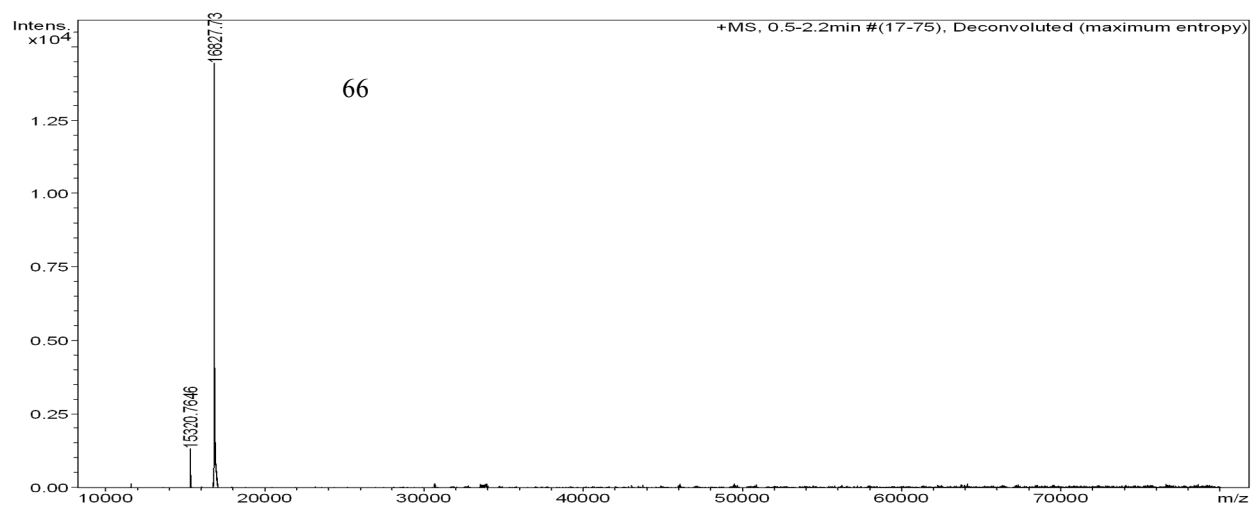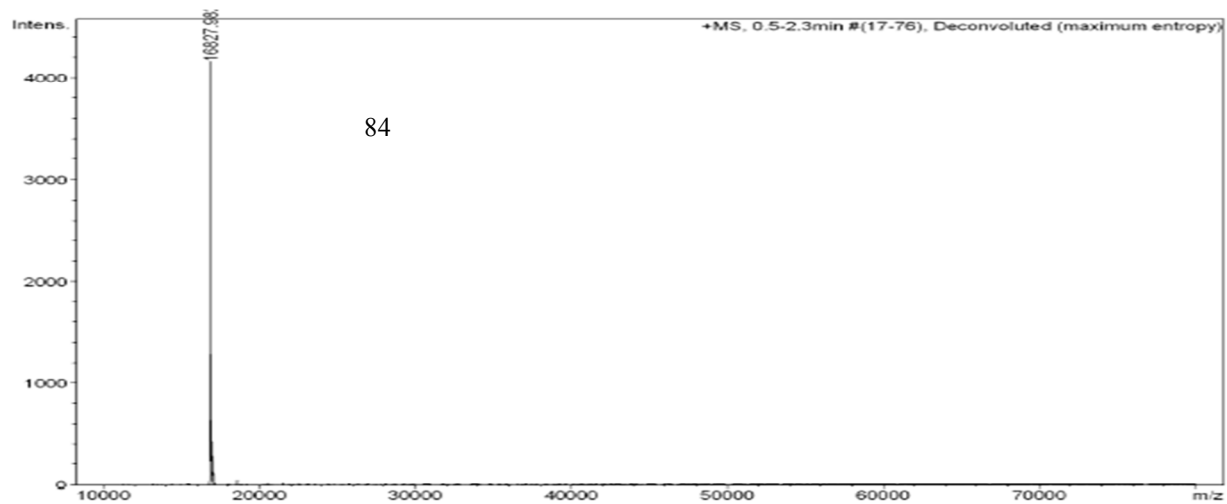

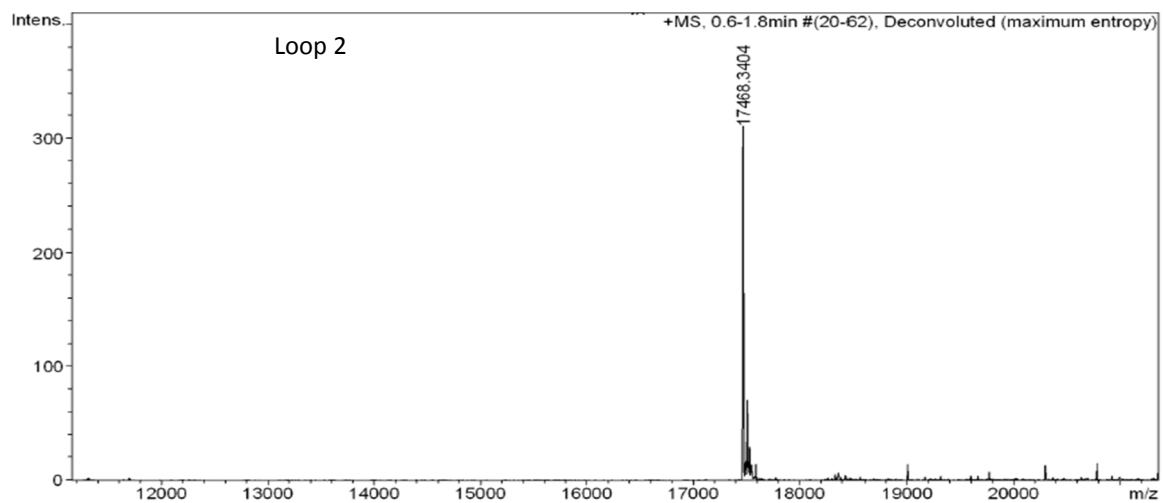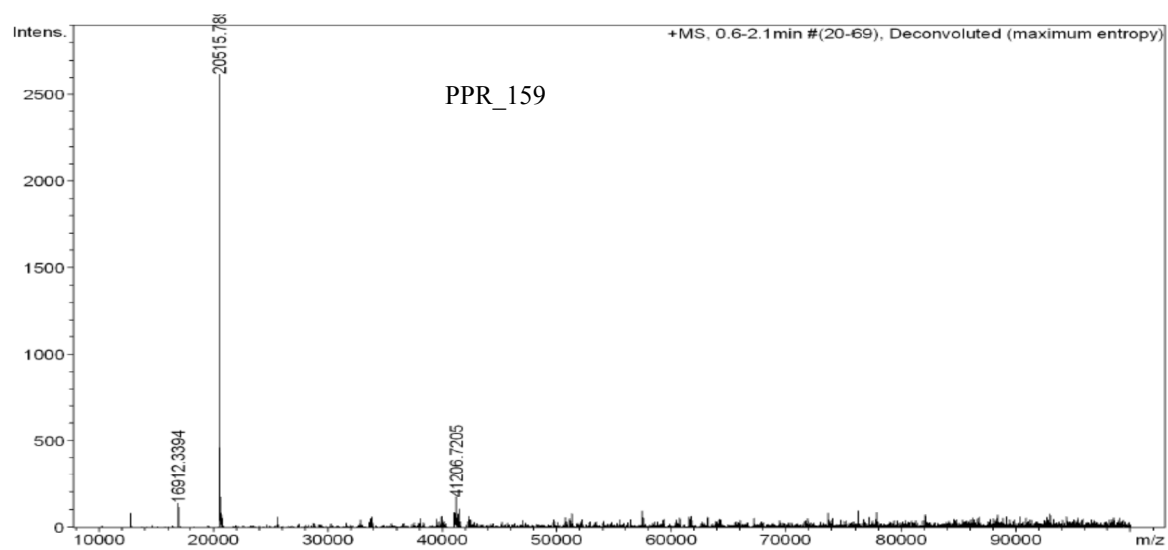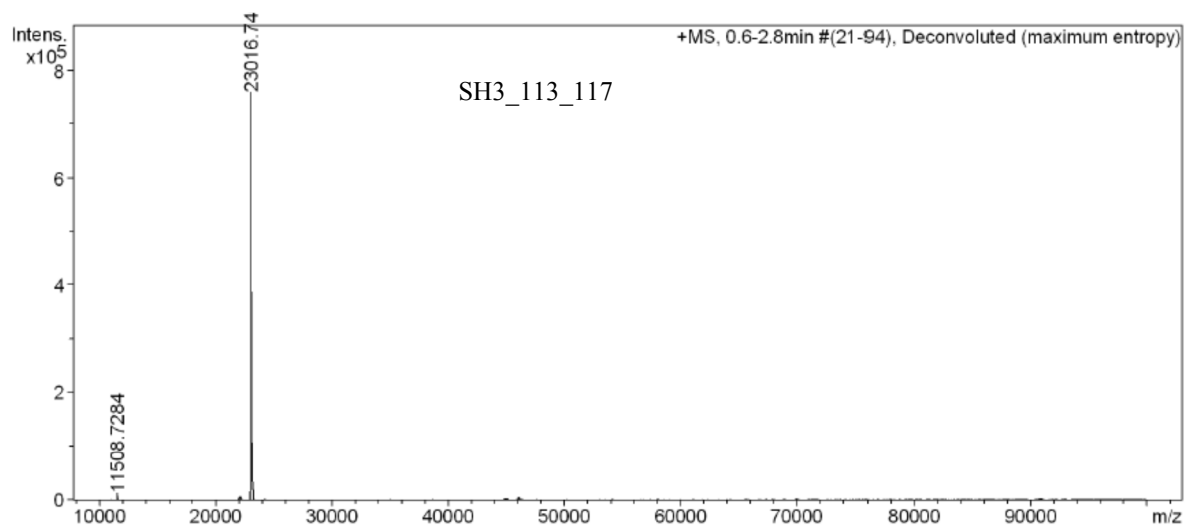

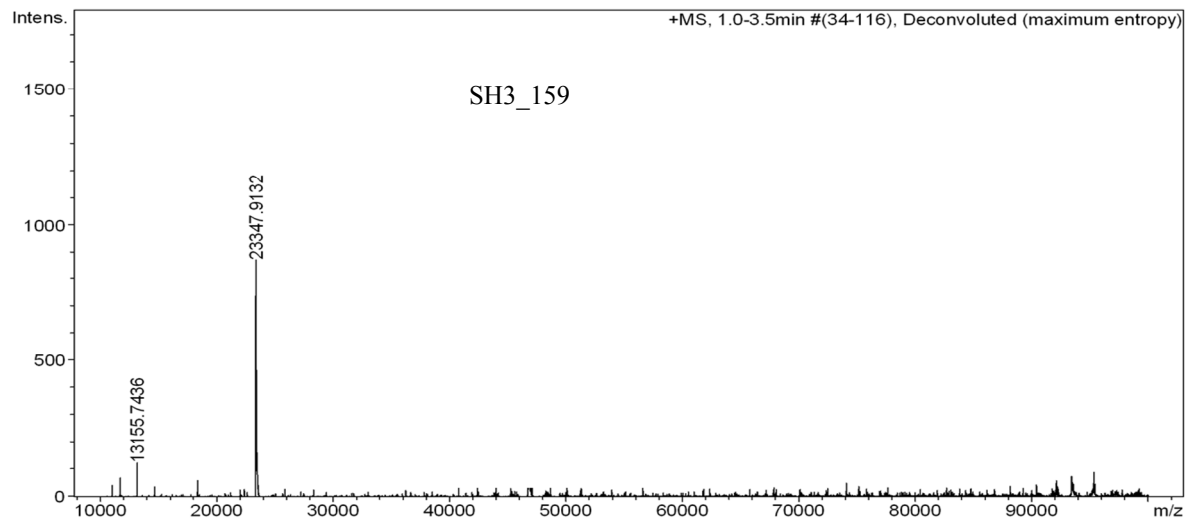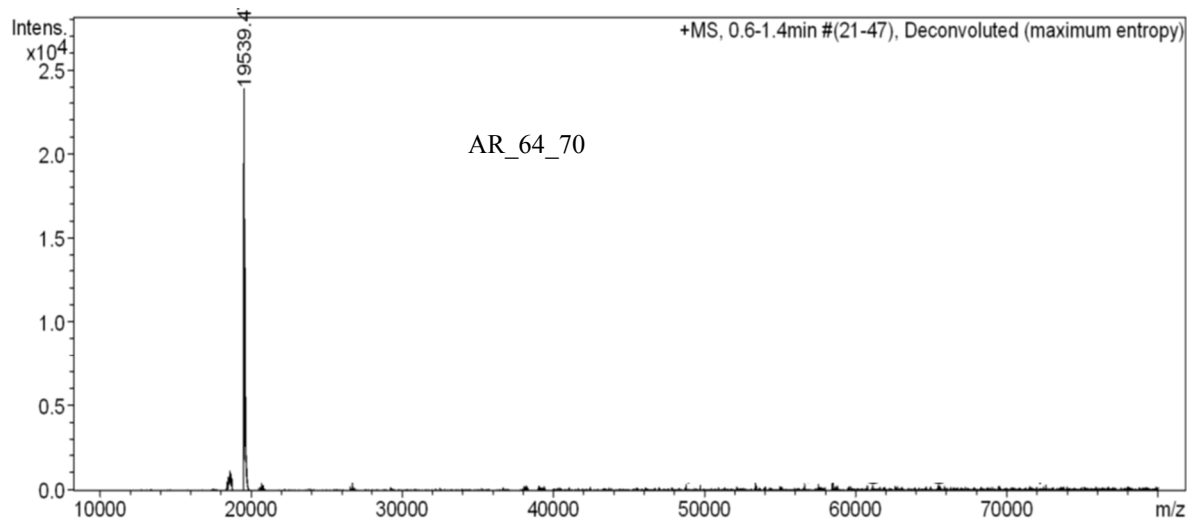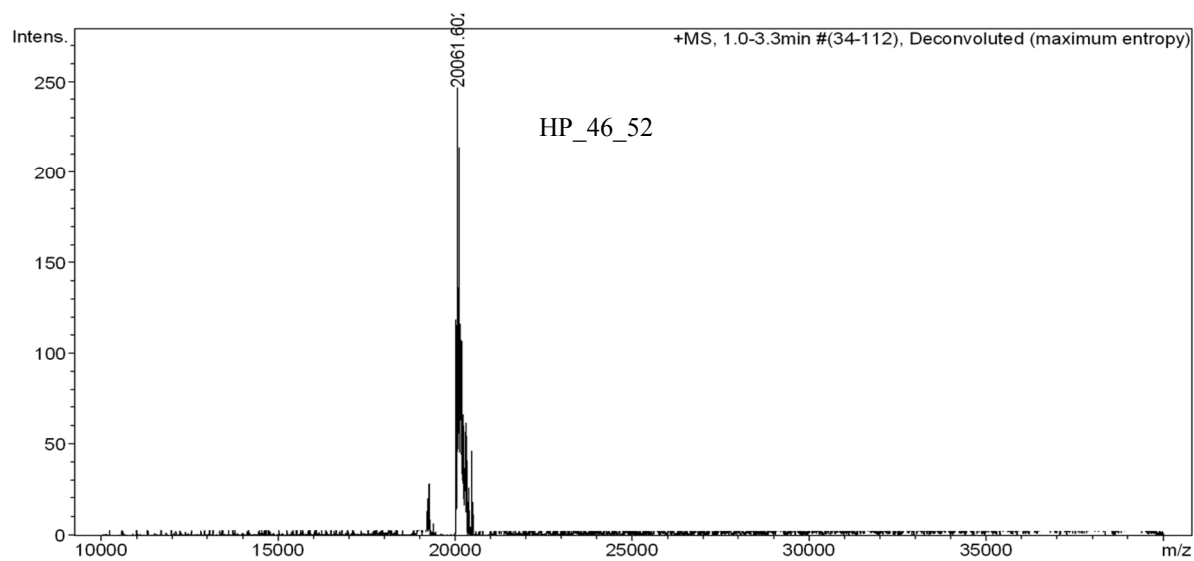

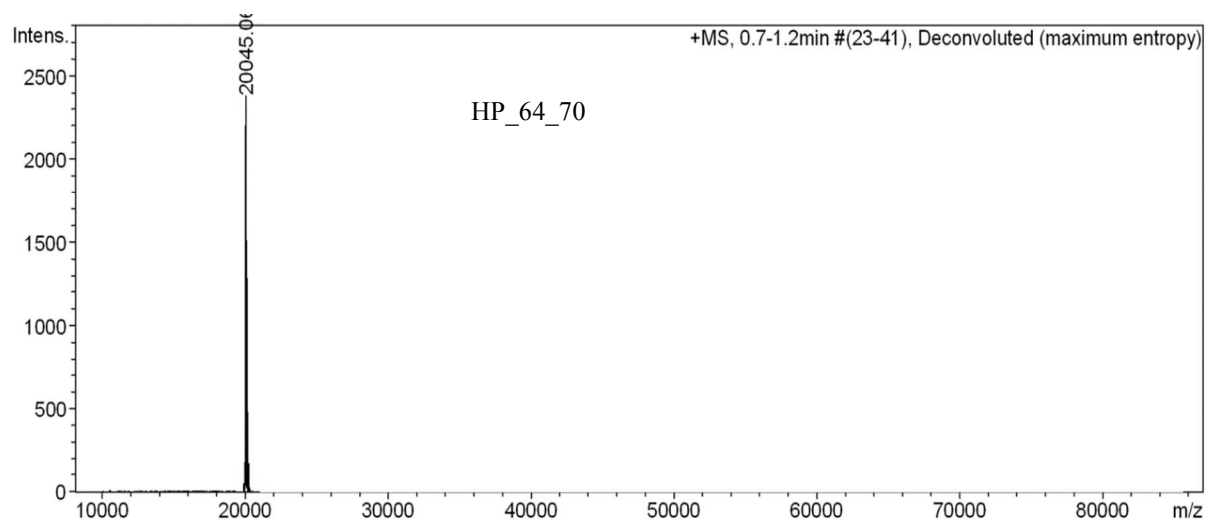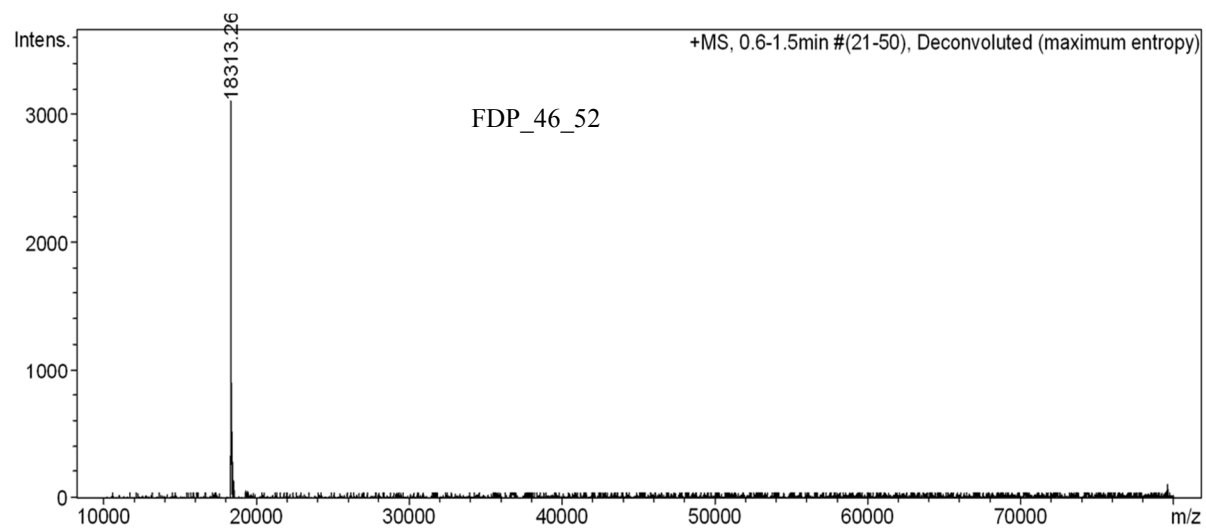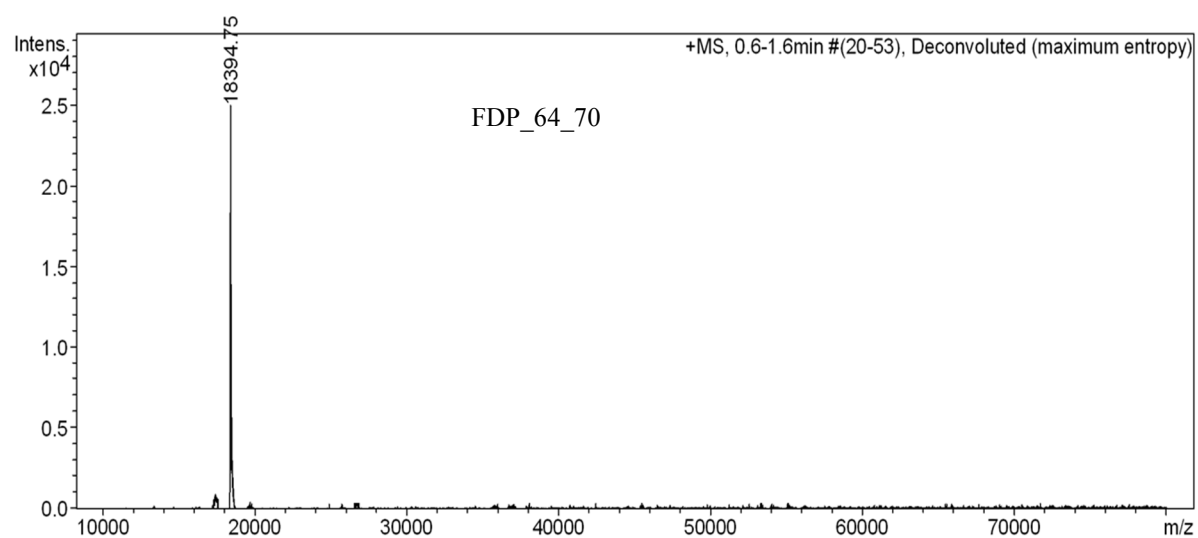



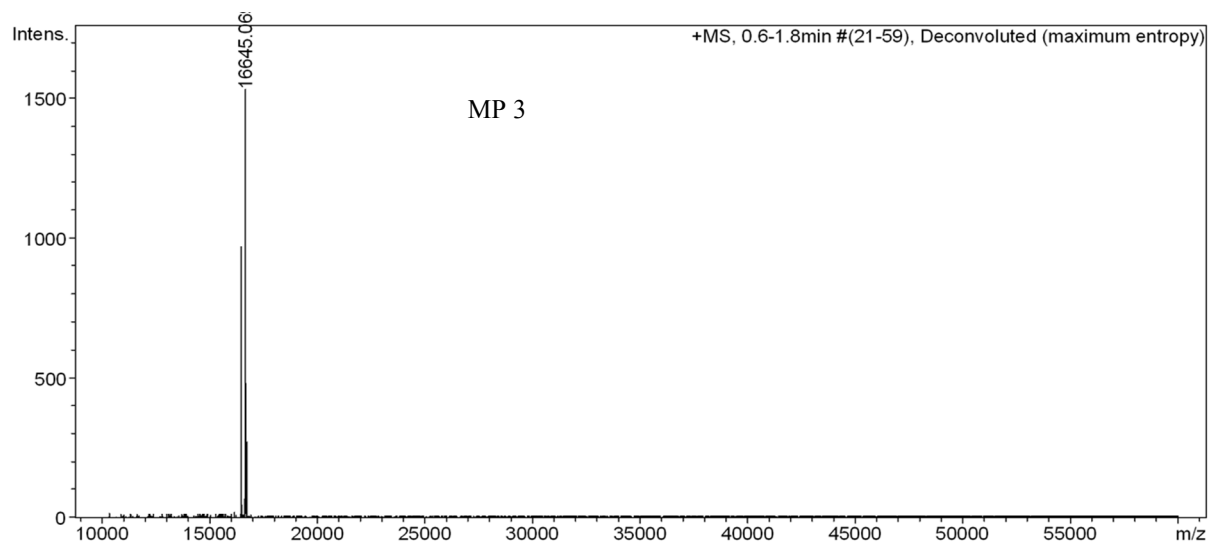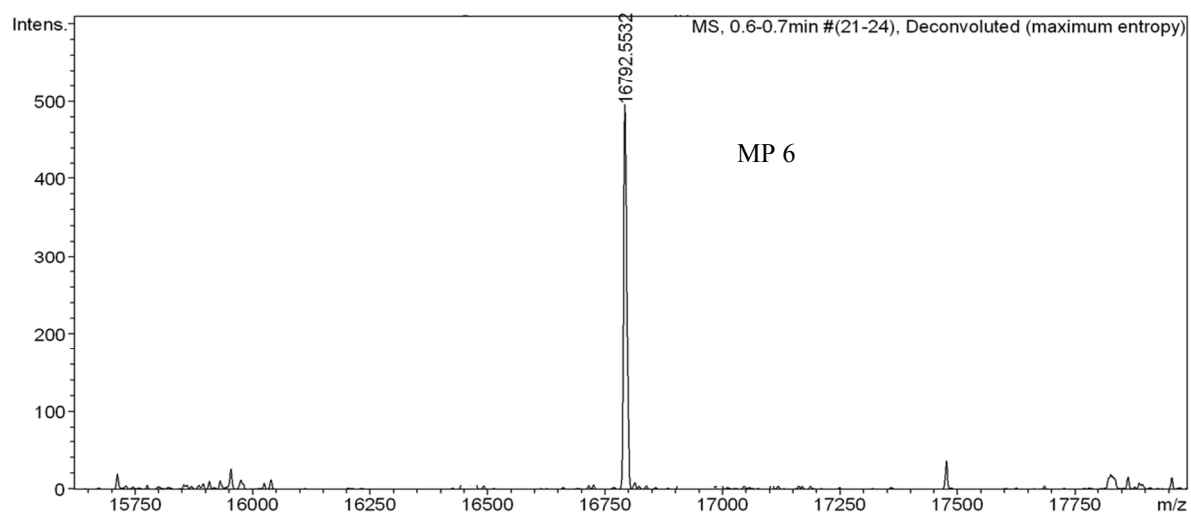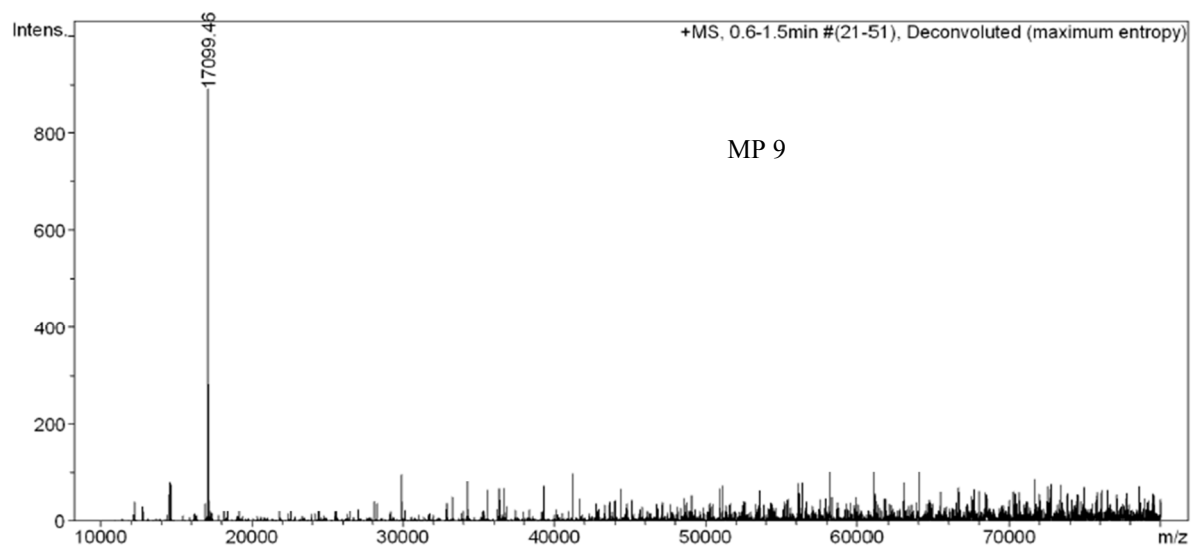

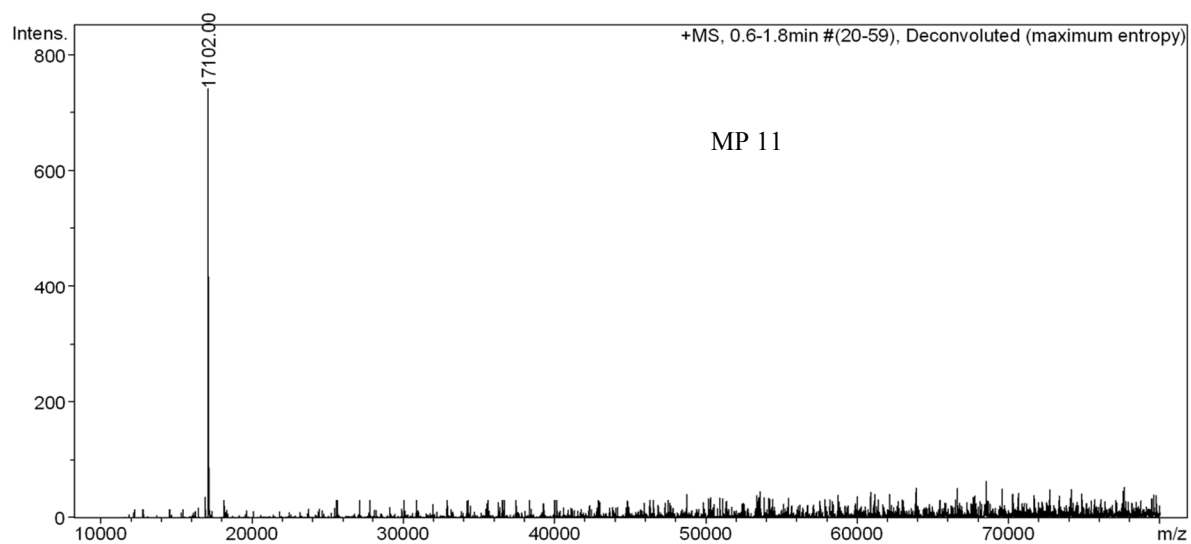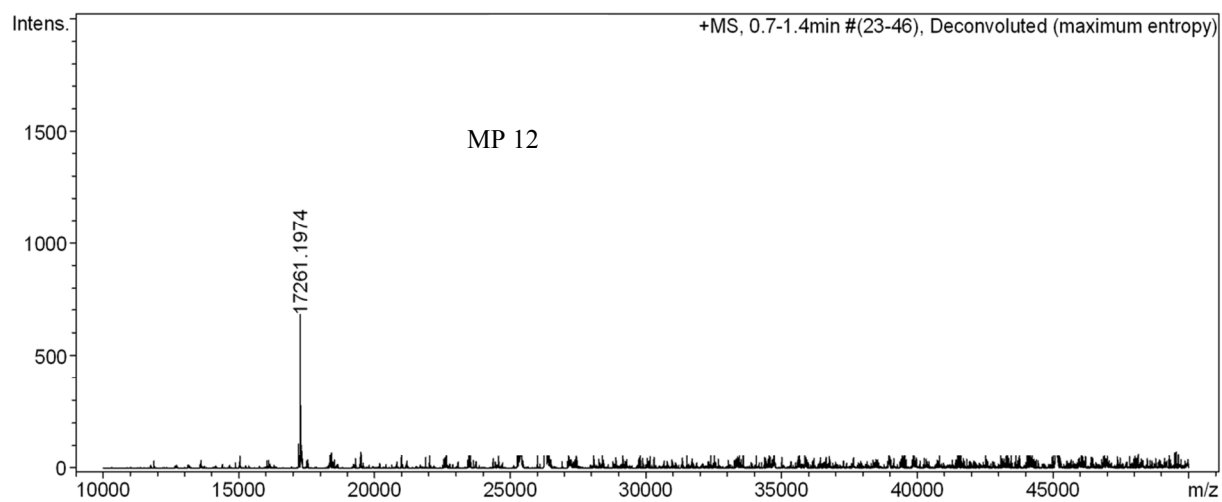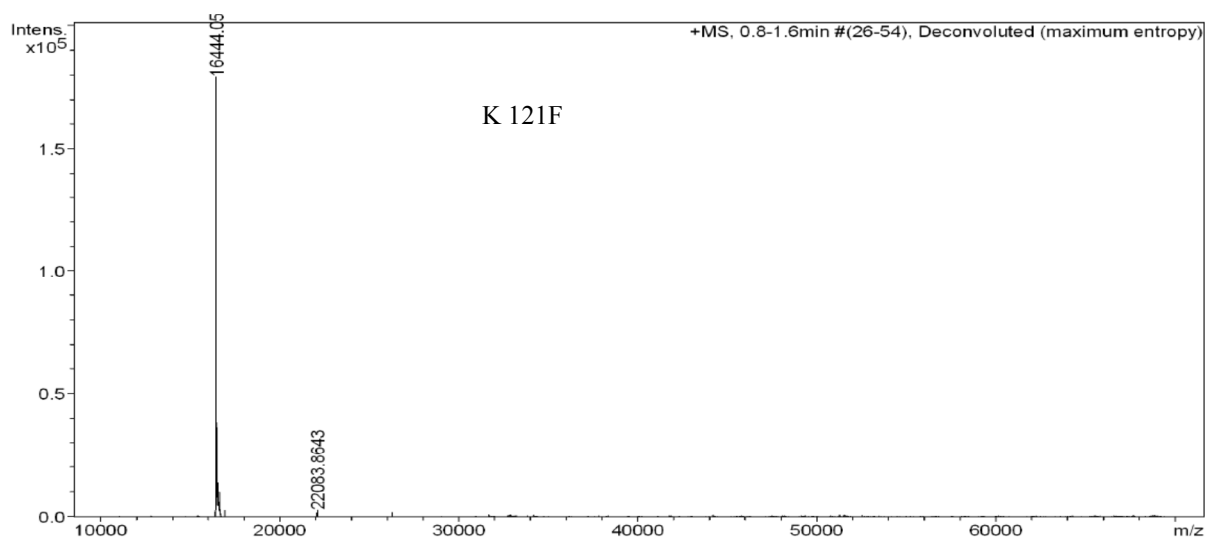

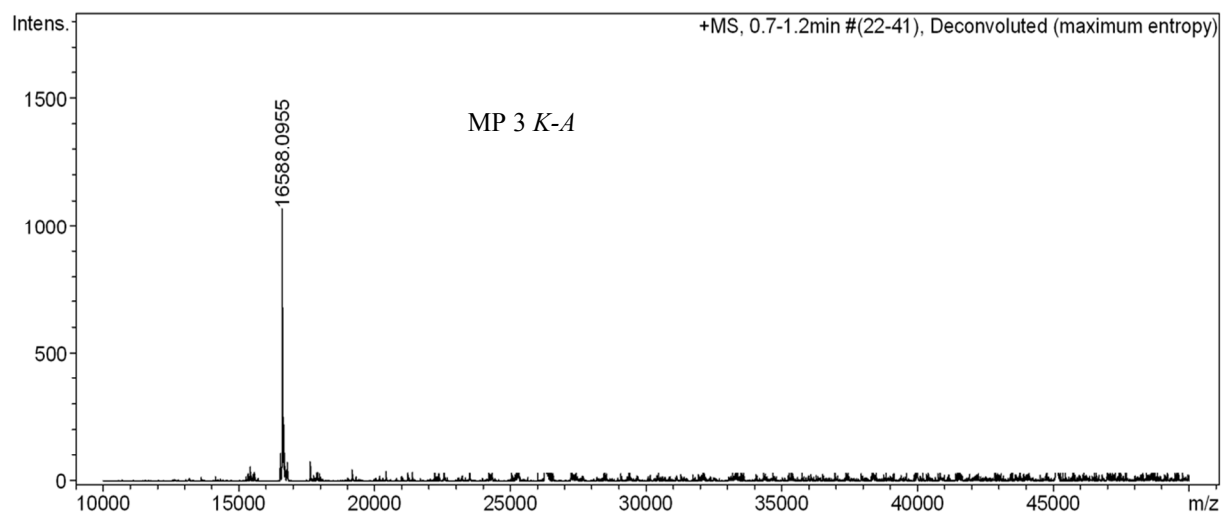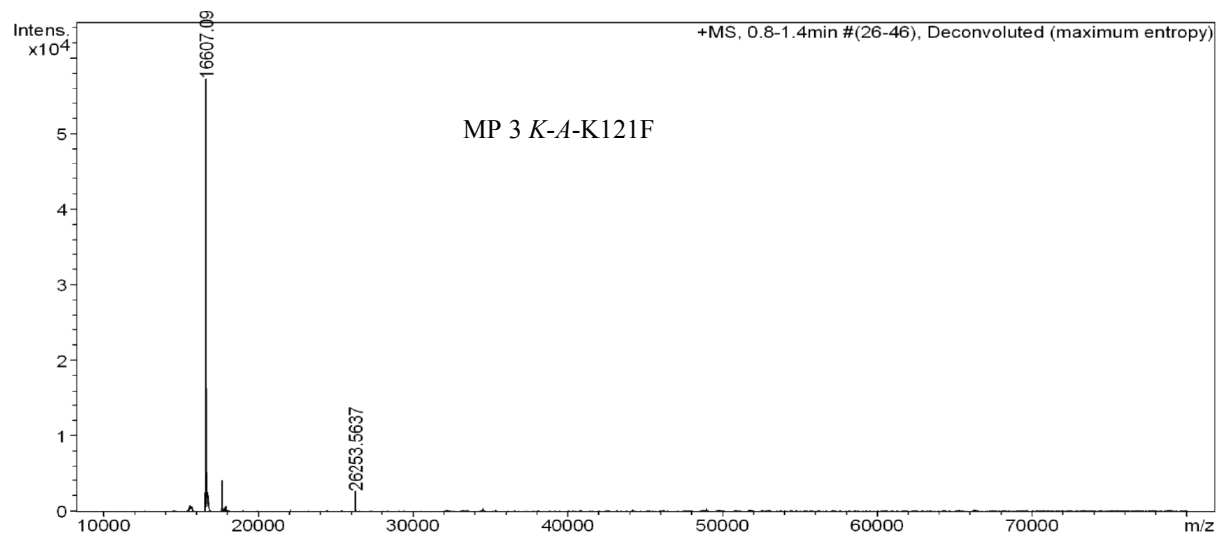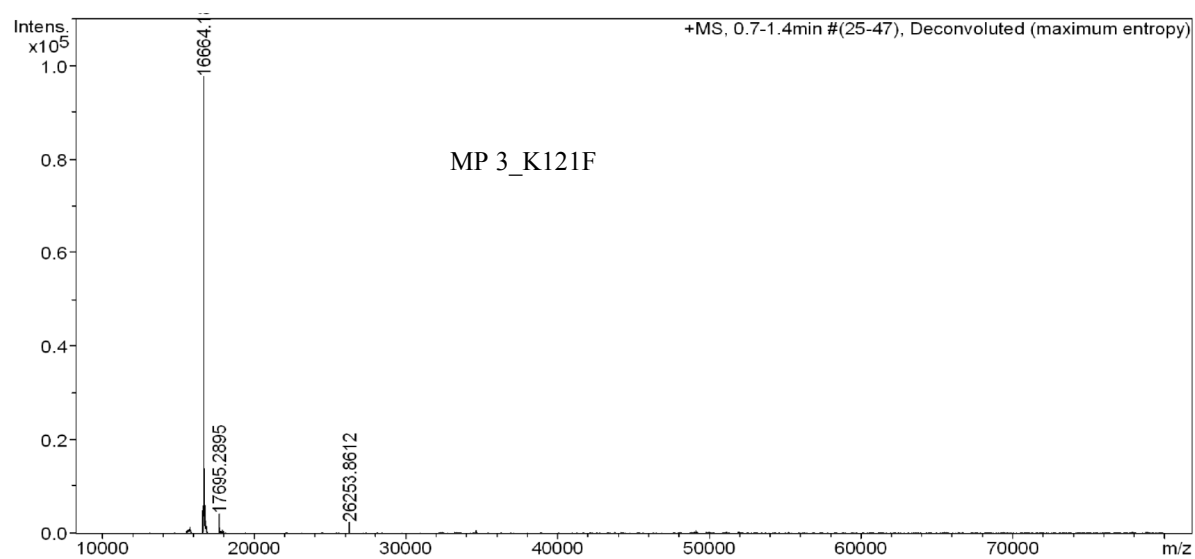

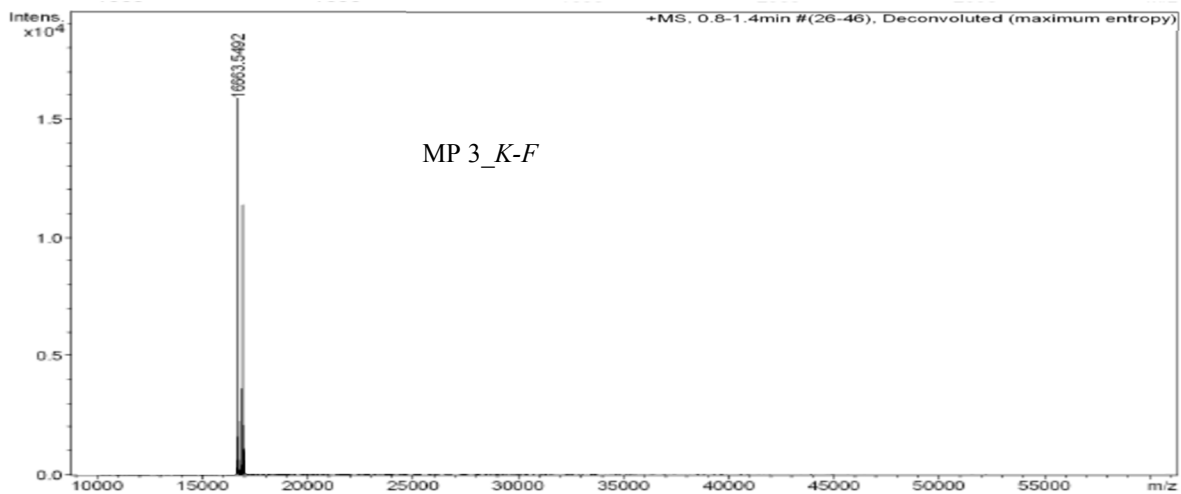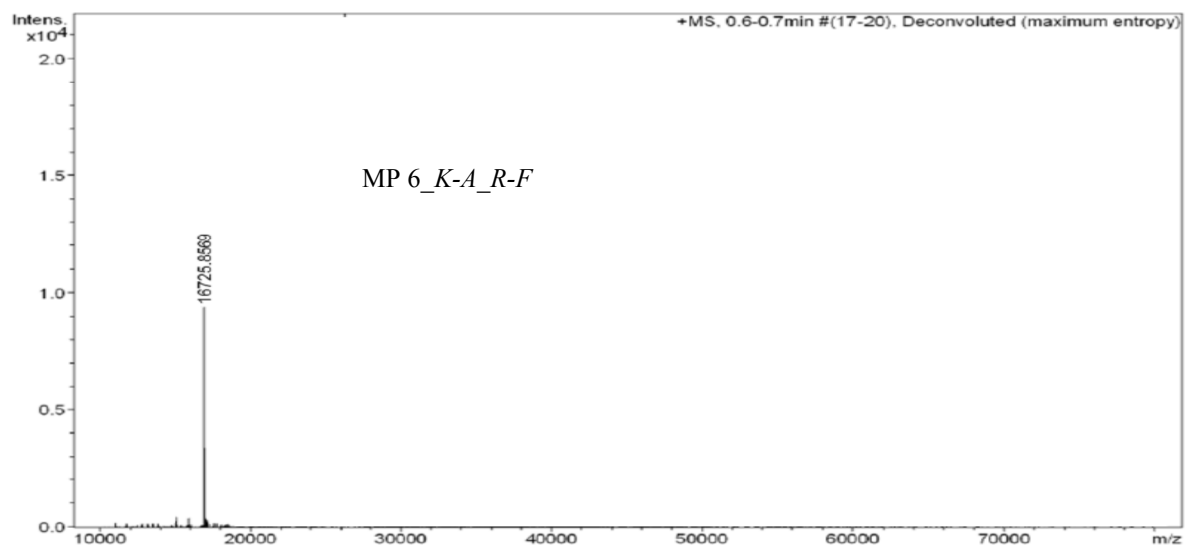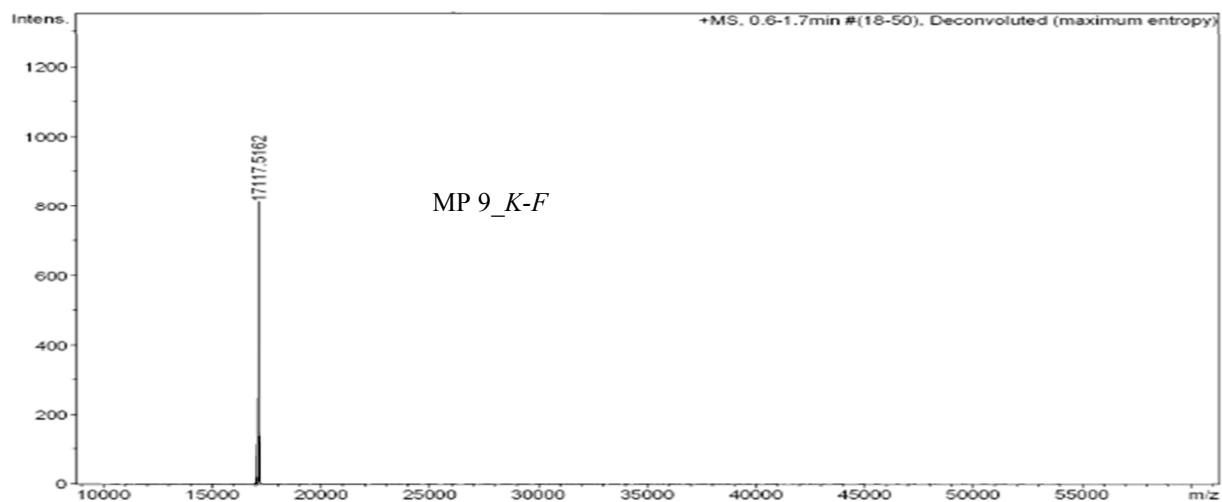

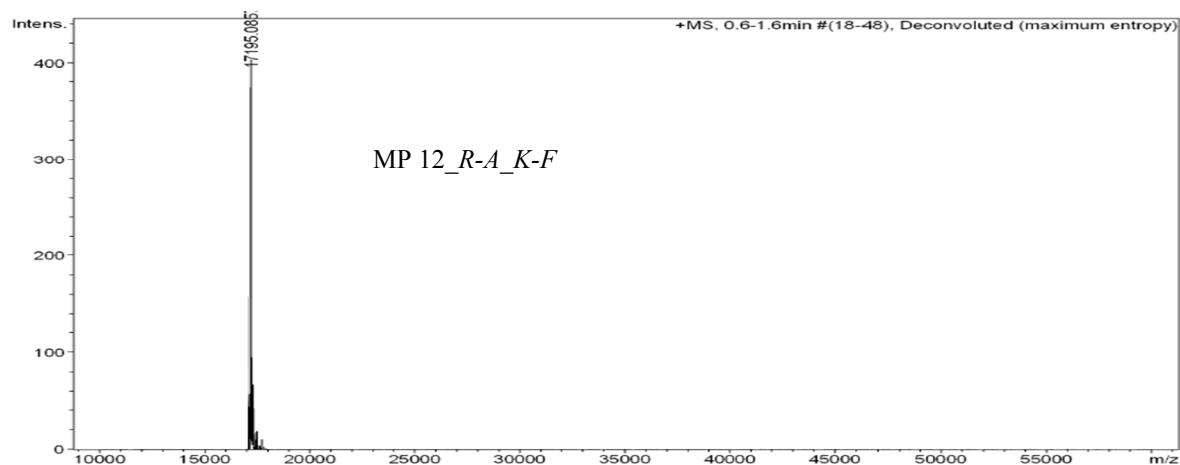

## S5. References

1. Wood, C. W.; Heal, J. W.; Thomson, A. R.; Bartlett, G. J.; Ibarra, A. A.; Brady, R. L.; Sessions, R. B.; Woolfson, D. N., *Bioinformatics* **2017**, *33*, 3043-3050.
2. Kabsch, W.; Sander, C., *Biopolymers* **1983**, *22*, 2577-2637
3. Touw, W. G.; Baakman, C.; Black, J.; te Beek, T. A. H.; Krieger, E.; Joosten, R. P.; Vriend, G., *Nucleic Acids Res.* **2015**, *43*, D364-D368.
4. Schwizer, F.; Kohler, V.; Durrenberger, M.; Knorr, L.; Ward, T. R., *ACS Catal.* **2013**, *3*, 1752-1755.
5. Koehler, V.; Mao, J.; Heinisch, T.; Pordea, A.; Sardo, A.; Wilson, Y. M.; Knoerr, L.; Creus, M.; Prost, J.-C.; Schirmer, T.; Ward, T. R., *Angew. Chem., Int. Ed.* **2011**, *50*, 10863-10866.
6. Mallin, H.; Hestercova, M.; Reuter, R.; Ward, T. R., *Nat. Protoc.* **2016**, *11*, 835-852.
7. Studier, F. W., *Protein Expression Purif.* **2005**, *41*, 207-234.
8. Monnard, F. W.; Nogueira, E. S.; Heinisch, T.; Schirmer, T.; Ward, T. R., *Chem. Sci.* **2013**, *4*, 3269-3274.
9. Kohler, V.; Wilson, Y. M.; Durrenberger, M.; Ghislieri, D.; Churakova, E.; Quinto, T.; Knorr, L.; Haussinger, D.; Hollmann, F.; Turner, N. J., *Nat. Chem.* **2013**, *5*, 93-99.
10. Cotellet, Y.; Lebrun, V.; Sakai, N.; Ward, T. R.; Matile, S., *ACS Cent. Sci.* **2016**, *2*, 388-393.
